# Supplementary material for: Differential roles for DNAJ isoforms in HTT-polyQ and FUS aggregation modulation revealed by chaperone screens
Source: Nat Commun. 2022 Jan 26;13:516. doi: 10.1038/s41467-022-27982-w (PMC8792056; doi:10.1038/s41467-022-27982-w)
Supplement: Supplementary file 1 — Supplementary Information [file 41467_2022_27982_MOESM1_ESM.pdf]

## **Supplementary Information**

### **Differential roles for DNAJ isoforms in HTT-polyQ and FUS aggregation modulation revealed by chaperone screens**

Kinneret Rozales<sup>#,1</sup>, Amal Younis<sup>#,1</sup>, Naseeb Saida<sup>1</sup>, Anatoly Meller<sup>1</sup>, Hodaya Goldman<sup>1</sup>, Lior Kellerman<sup>1</sup>, Ronit Heinrich<sup>2</sup>, Shai Berlin<sup>2</sup>, and Reut Shalgi<sup>\*,1</sup>

<sup>1</sup>Department of Biochemistry, Rappaport Faculty of Medicine, Technion–Israel Institute of Technology, Haifa 31096, Israel

<sup>2</sup>Department of Neuroscience, Rappaport Faculty of Medicine, Technion–Israel Institute of Technology, Haifa 31096, Israel

<sup>#</sup>These authors equally contributed to the work

\* Corresponding author: [reutshalgi@technion.ac.il](mailto:reutshalgi@technion.ac.il)

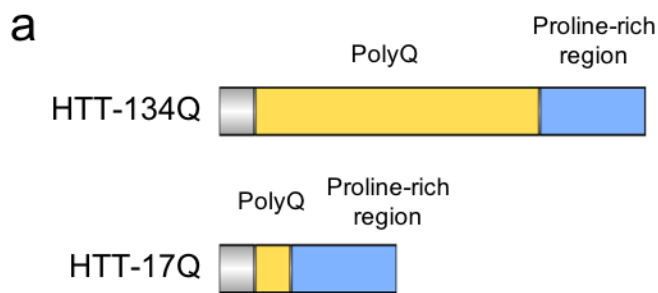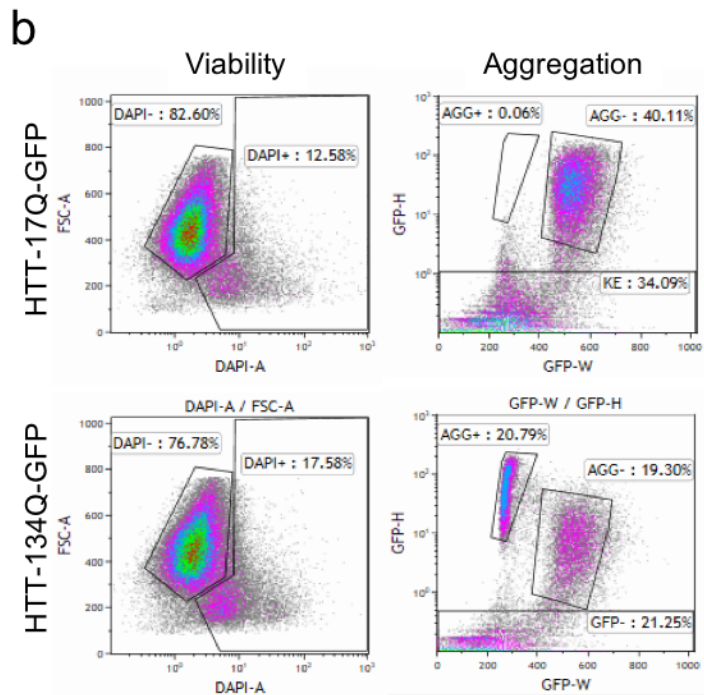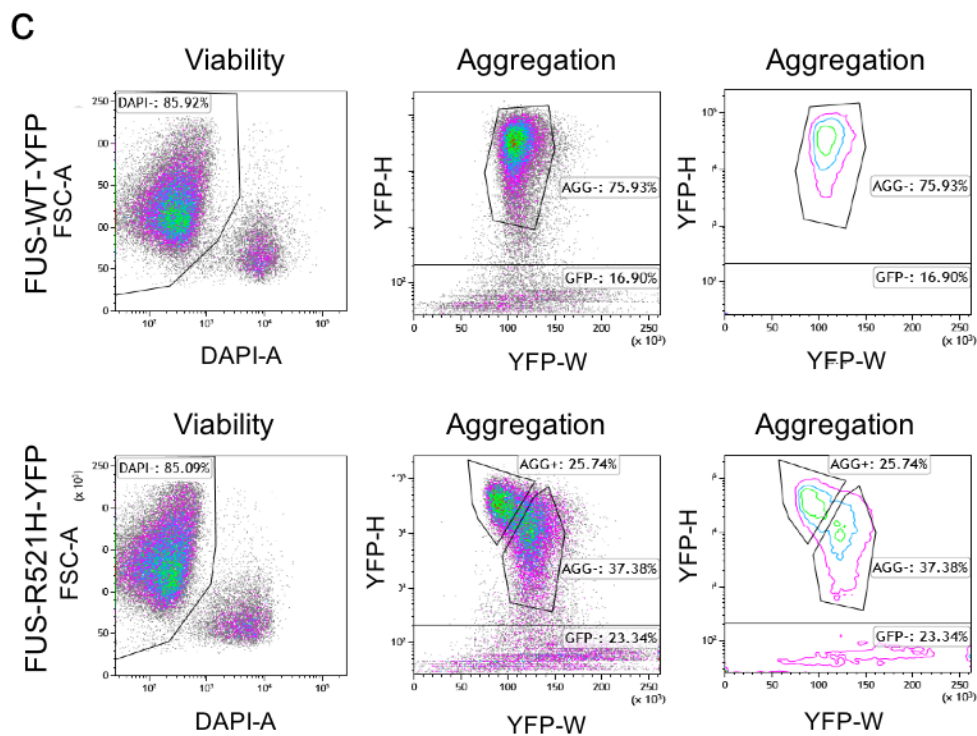

**Supplementary Figure 1: HTT-134Q and mutFUS aggregation analyzed by PuLSA flow cytometry.**

(a) Schematic illustration of the CAG triplet repeat expansion, encoding polyglutamine (polyQ, yellow), within exon 1 of the HTT gene. Proline-rich region is also present in the plasmid (blue). (b) Cells were transfected with HTTQ17-GFP or HTT134Q-GFP and analyzed by PuLSA<sup>1</sup> 48 hours later. DAPI exclusion (left) was used to quantify and filter only viable cells. Diffused expression of HTT17Q-GFP protein (top right) shows a single fluorescent cell population, while expression of aggregating HTT134Q-GFP (bottom right) gives rise to a new distinct subpopulation, with a smaller fluorescence peak width and overall higher intensity (gate AGG+). (c) Cells were transfected with FUS-R521H-YFP or FUS-WT-YFP and analyzed by FACS 48 hours later. DAPI exclusion was used to exclude and filter for viable cells only. Diffused expression of FUS-WT-YFP protein shows a single population, while expression of aggregating FUS-R521H-YFP gives rise to a new subpopulation, with a smaller fluorescence peak width and overall higher intensity. Contour plots (on the right) demonstrate the two subpopulations in FUS-R521H-YFP expressing cells (bottom) vs. a single population with FUS-WT-YFP expressing cells.

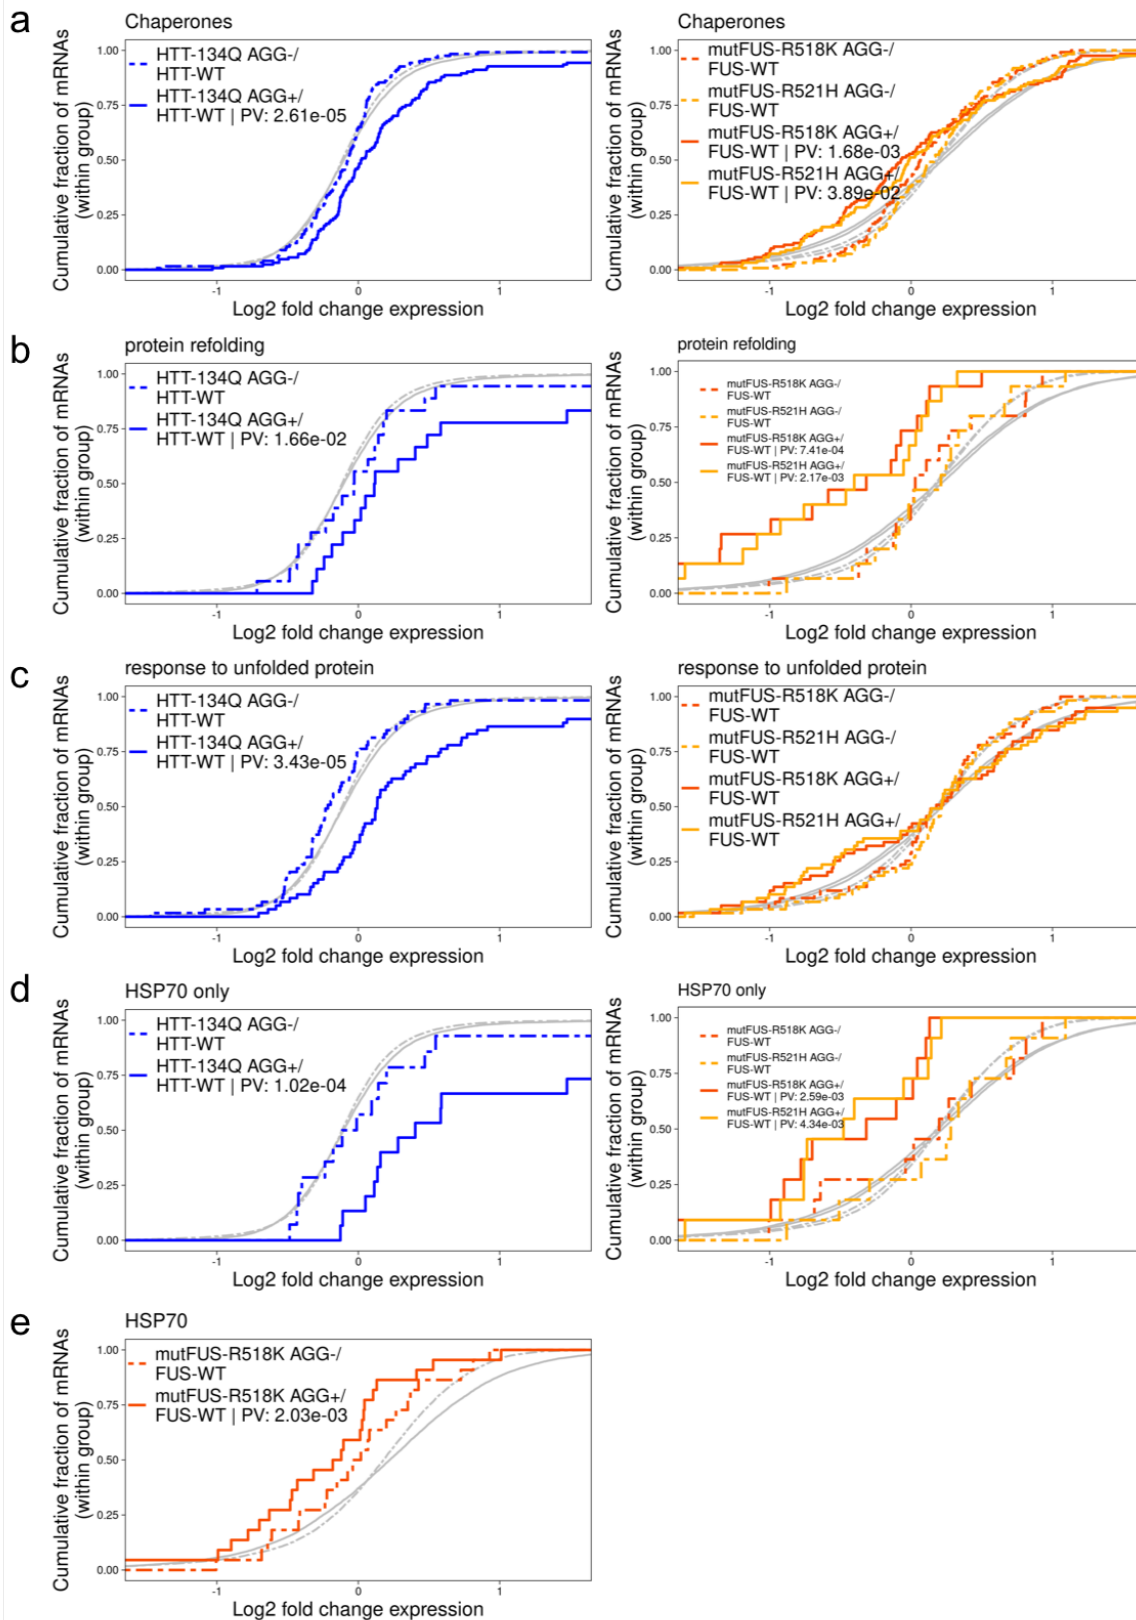

**Supplementary Figure 2: Stress response and chaperones are induced in response to HTT-polyQ aggregation, and repressed in mutFUS aggregate-containing cells.**

Cumulative distribution function (CDF, y-axis) of Log2 Fold Change (LFC) values, as in Fig. 1d, for defined groups of mRNAs. Expression was significantly induced in cells containing HTT-134Q aggregates (blue), but not in mutFUS expressing cells (yellow – FUR-R521H-YFP and orange – FUR-R518K-YFP). (a) Chaperones, as defined in Sabath et al.<sup>2</sup>. The Gene Ontology categories “protein refolding” (b) and

“response to unfolded proteins” (c), HSP70 family chaperones (excluding NEFs), as defined in Brehme et al.<sup>3</sup> (d) and HSP70 for FUS-R518K-YFP as in Fig. 1d (e). In all cases, groups were induced in response to HTT-polyQ aggregation, but not in response to aggregation of mutFUS. Background (grey) – defined as all expressed genes. t-test p-values are shown in the legend, for the difference between the LFC distribution of the group of interest compared to the respective LFC distribution of the background set, only when significant.

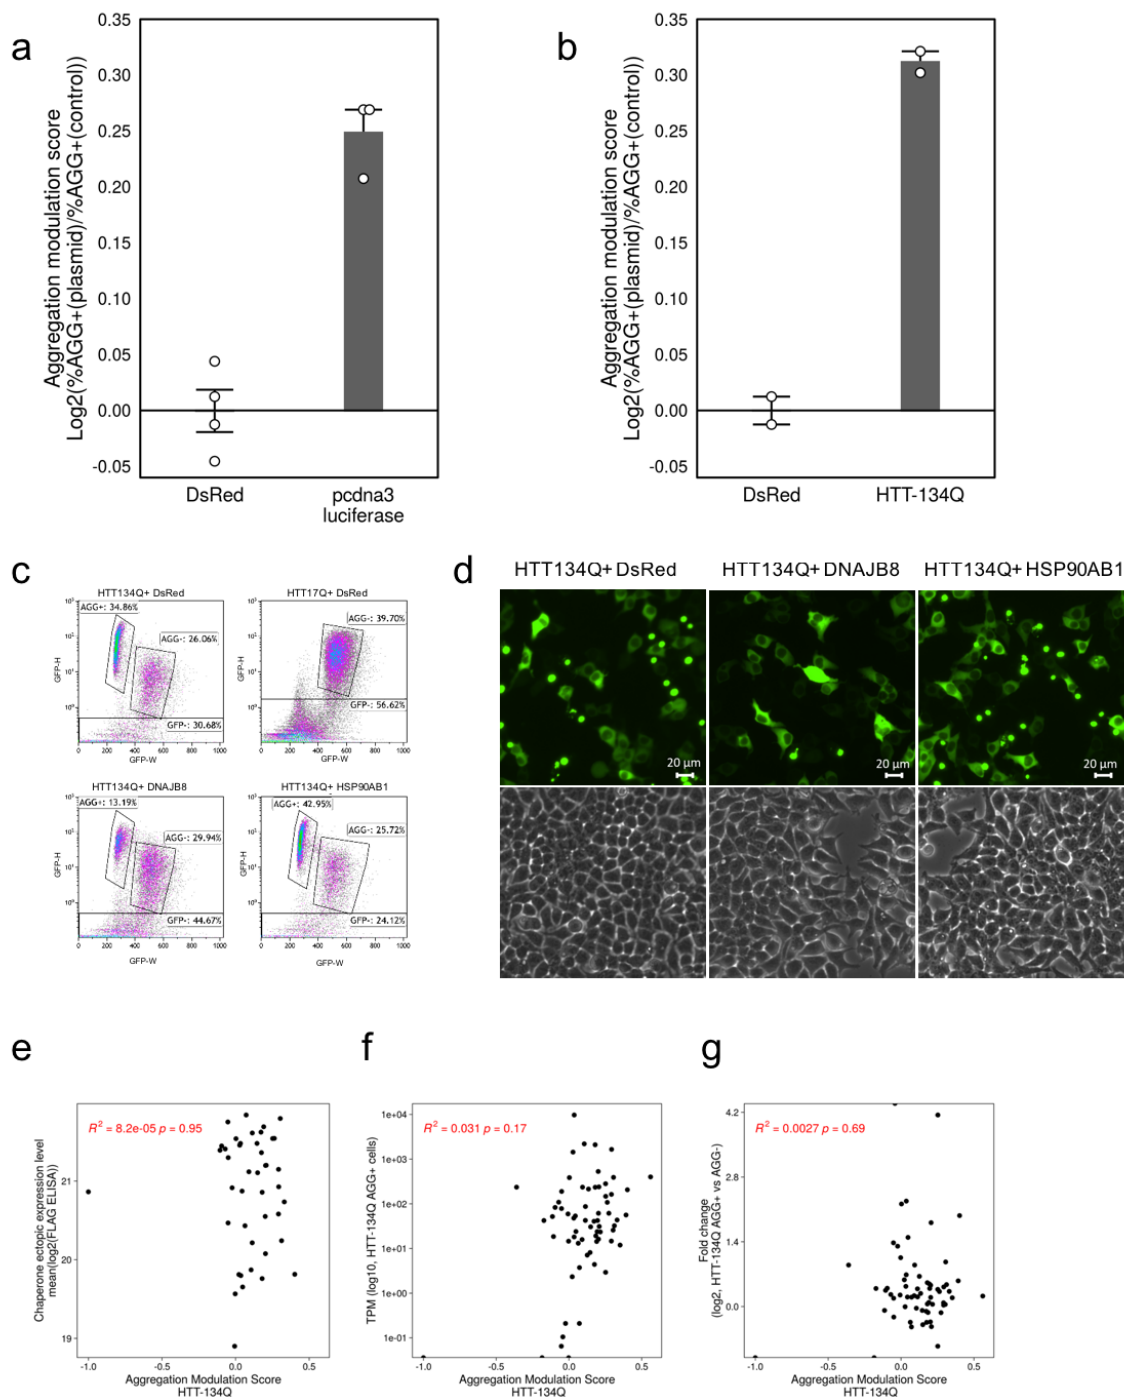

### Supplementary Figure 3: HTT-polyQ aggregation modulation screen for chaperone modifiers.

(a-b) DsRed co-expressing cells show lower HTT-134Q-GFP aggregation baseline compared to the co-expression of luciferase (a) or HTT-134Q alone (b), and were thus chosen as a baseline control for the co-expression screen. Data are presented as mean values  $\pm$  SEM for  $n=4/3$  for DsRed/luciferase respectively. (a) and  $n=2$  (b) biologically independent samples. Source data are provided as a Source Data file. (c) PulSA analysis of HEK293T cells, 48h after transfection with HTT-17Q-GFP or HTT-134Q-GFP. A distinctive group of cells containing HTT-134Q-GFP aggregated (AGG+) is shown on the left, and is missing in cells expressing the wild-type protein (HTT-17Q-GFP). AGG+ cell population was around 34% in control

DsRed co-expressing cells and reduced to about 13% when DNAJB8 was co-expressed. In contrast, co-expression of HSP90AB1 increased AGG+ fraction to about 43%. (d) Fluorescence microscopy images of HEK293T cells 48h after co-expression of HTT-134Q-GFP with either DsRed control, DNAJB8 or HSP90AB1. DNAJB8 aggregation alleviation is qualitatively observed compared to DsRed control or HSP90AB1, which aggravated the aggregation phenotype. Shown are representative fields from n=3 biologically independent experiments. (e) HTT-134Q Aggregation modulation scores (x-axis) are not explained by the degree of chaperone overexpression (y-axis), as measured using sandwich ELISA assay ( $\log_2$ ), in HEK293T cells transfected with HTT-134Q-GFP for 48h. Correlation p-value is indicated. (f) HTT-134Q Aggregation modulation scores (x-axis) do not correlate with basal chaperone expression levels (y-axis), as measured by RNA-seq from HEK293T cells expressing HTT-134Q-GFP for 48h, which have undergone sorting for aggregate containing cells (AGG+). Expression levels represented by  $\log_{10}$  TPM values. Correlation p-value is indicated. (g) HTT-134Q Aggregation modulation scores (x-axis) do not correlate with fold changes of chaperones following HTT-134Q aggregation. Fold changes (presented as  $\log_2$ , y-axis) were calculated based on RNA-seq data TPM values as in (f), which were divided by the RNA-seq TPM values of the chaperones in the HTT-134Q-GFP non-aggregating cells (denoted AGG-). Correlation p-value is indicated.

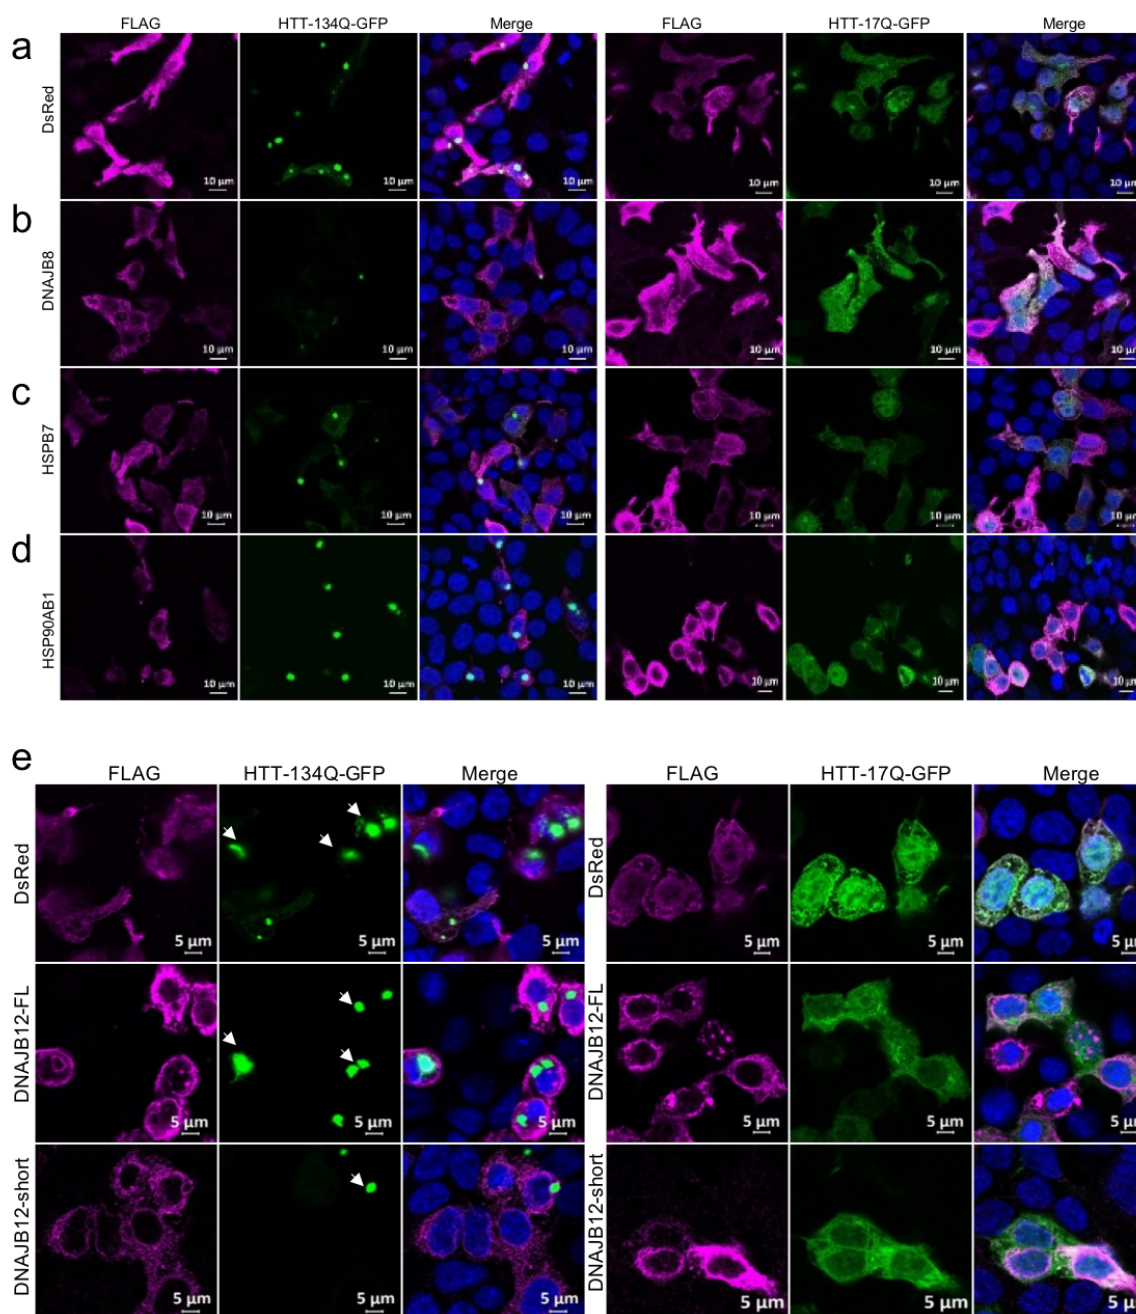

**Supplementary Figure 4: HTT-134Q aggregation is modulated by different chaperones**

(a-d) Confocal microscopy images of HEK293T cells following 48h transfection with HTT-134Q-GFP or HTT-17Q-GFP (green) co-expressed with FLAG tagged constructs (FLAG in pink), of (a) DsRed control (b) DNAJB8 (c) HSPB7 (d) HSP90AB1. DAPI (blue) marks nuclei. Shown are representative fields from n=2 biologically independent experiments. (e) Immunofluorescence imaging of HTT-134Q-GFP or HTT-17Q-GFP (green) together with FLAG-tagged DsRed, DNAJB12-FL or DNAJB12-short (FLAG in pink). Aggregates are marked with white arrows. Shown are representative fields from n=2 biologically independent experiments.

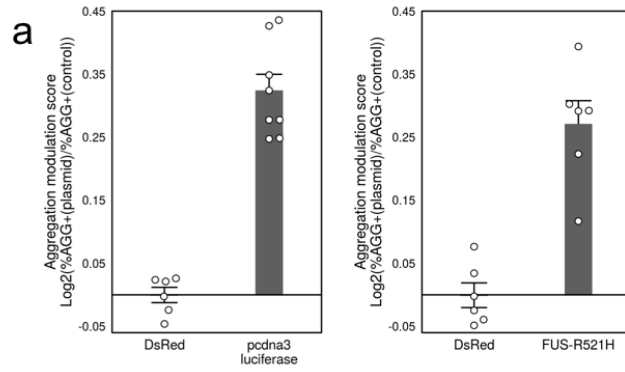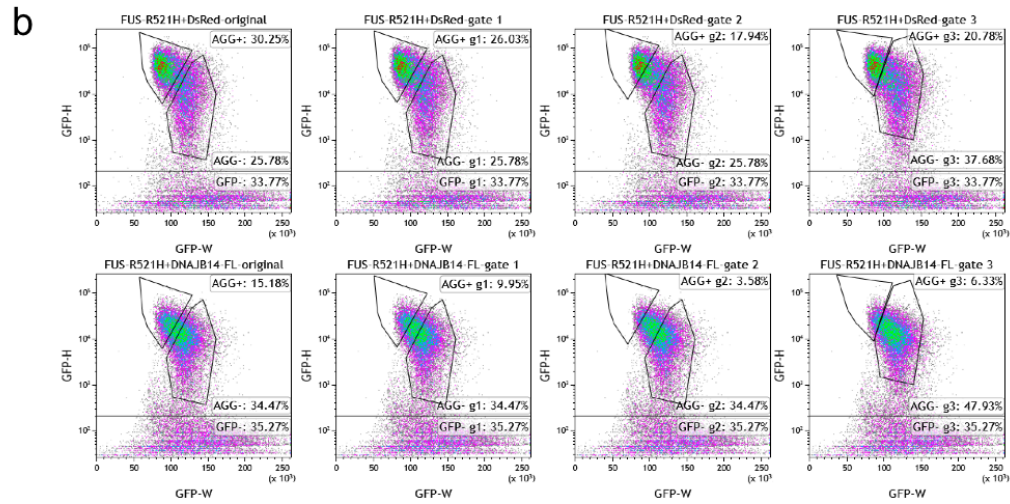

Aggregation modulation score (mean)

|                   | Original gate | Gate 1 | Gate 2 | Gate 3 |
|-------------------|---------------|--------|--------|--------|
| <b>DNAJB14-FL</b> | -0.819        | -1.132 | -1.986 | -1.675 |
| <b>BAG3</b>       | -0.668        | -0.964 | -2.120 | -1.513 |
| <b>HSF1</b>       | -0.530        | -0.706 | -1.143 | -0.968 |
| <b>DNAJC30</b>    | -0.459        | -0.548 | -0.761 | -0.645 |

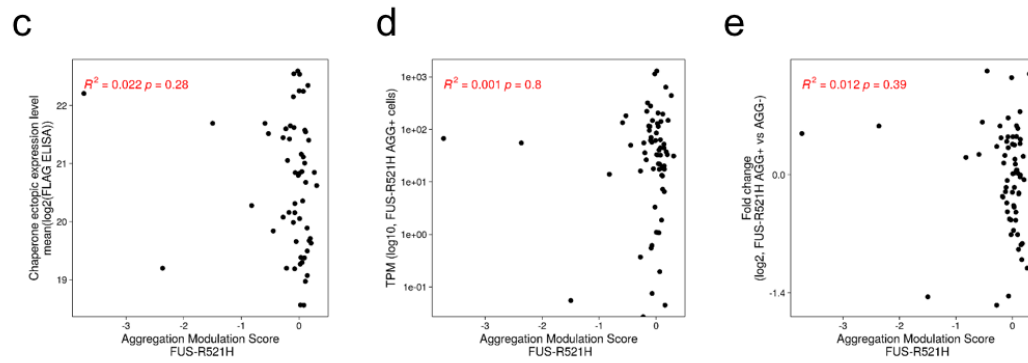

f

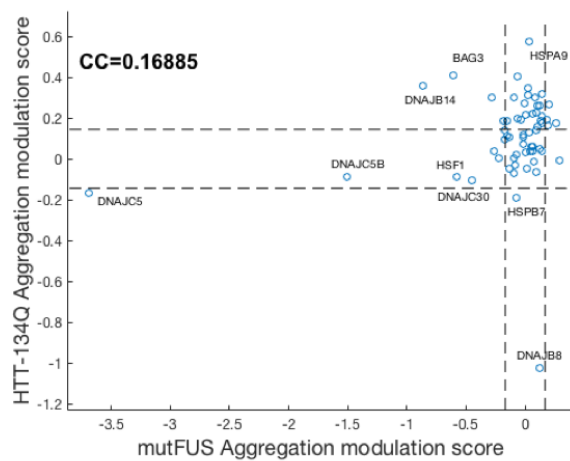

g

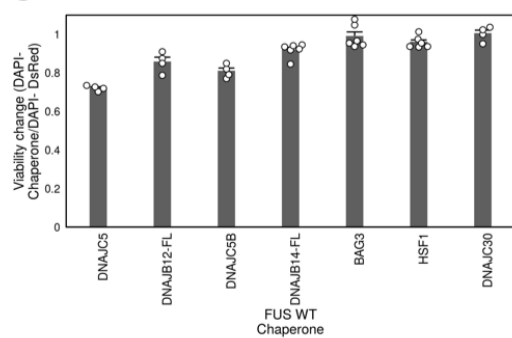

h

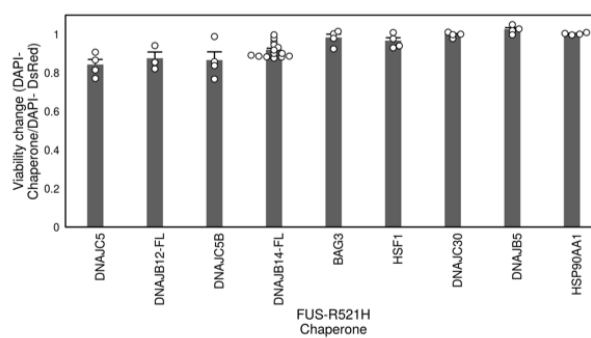

i

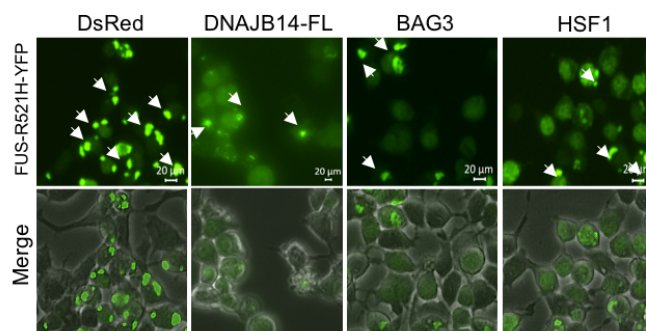

j

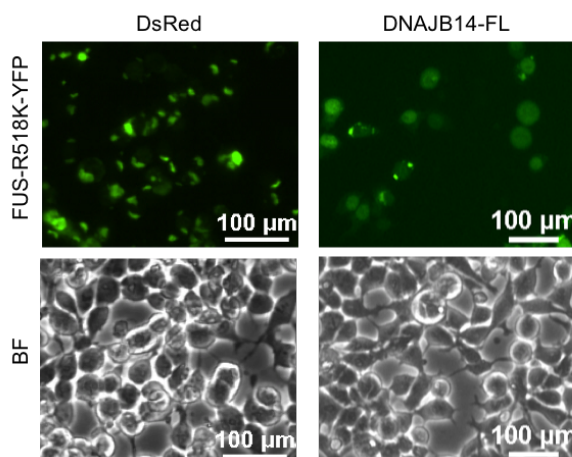

k

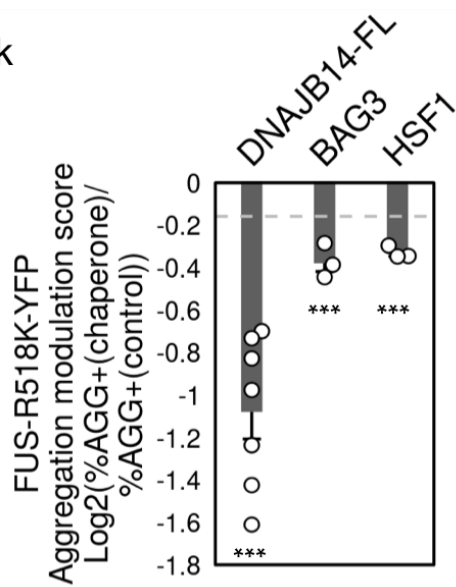

## Supplementary Figure 5: mutFUS aggregation modulation screen reveals chaperone modifiers

(a) DsRed plasmid co-expression together with FUS-R521H-YFP showed lower aggregation baseline compared to luciferase (left) or FUS-R521H alone (right) and was therefore chosen as a baseline control for the co-expression screen. Data are presented as mean values  $\pm$  SEM for  $n=6/8$  (DsRed/luciferase, left panel) and  $n=6$  (DsRed/FUS-R521H alone, right panel) biologically independent samples. Source data are provided as a Source Data file. (b) Rescue of FUS-R521H-YFP aggregation by different chaperones is robust to choice of FACS parameter settings. We applied different gates for identification of aggregate positive cell populations – three additional gates are illustrated for DsRed (top row) and DNAJB14-FL expressing cells (middle). We changed the gate settings for all chaperones listed in the table below, which significantly rescued aggregation, as well as for the DsRed controls, and re-calculated the Aggregation modulation score, which is presented in the table (bottom), average of  $N=4$  replicates. All scores remain significant. (c) FUS-R521H-YFP Aggregation modulation scores (x-axis) are not explained by the degree of chaperone overexpression (y-axis,  $\log_2$ ), as measured using sandwich ELISA assays, in HEK293T cells transfected with FUS-R521H-YFP for 48h. Correlation p-value is indicated. (d) FUS-R521H-YFP Aggregation modulation scores (x-axis) do not correlate with basal chaperone expression levels (y-axis), as measured by RNA-seq from HEK293T cells expressing FUS-R521H-YFP for 48h, which have undergone sorting for aggregate containing cells (AGG+). Expression levels represented as  $\log_{10}$  TPM values. Correlation p-value is indicated. (e) FUS-R521H-YFP Aggregation modulation scores (x-axis) do not correlate with fold changes of chaperones following FUS-R521H-YFP aggregation. Fold changes (presented as  $\log_2$ , y-axis) were calculated based on RNA-seq data TPM values as in (d), which were divided by the RNA-seq TPM values of the chaperones in the FUS-R521H-YFP non-aggregating cells (denoted AGG-). Correlation p-value is indicated. (f) Aggregation modulation score for HTT-134Q plotted against those of FUS-R521H, dashed lines represent the 95% confidence intervals corresponding to each of the aggregating proteins. Correlation between the scores is minimal and rescue chaperones do not overlap. (g-h) Cell viability percentages of top significant chaperones, assayed by DAPI exclusion using FACS. Data are presented as mean values  $\pm$  SEM of  $n=4$  (for DNAJC5, DNAJB12-FL, DNAJC5B, DNAJC30) and  $n=6$  (for DNAJB14-FL, BAG3, HSF1) biologically independent samples in FUS-WT (g) and  $n=4$  (for DNAJC5, DNAJC5B, BAG3, HSF1, DNAJC30, DNAJB5, HSP90AA1)  $n=3$  (for DNAJB12-FL) and  $n=14$  (DNAJB14-FL) biologically independent samples in FUS-R521H (h) expressing cells. Source data are provided as a Source Data file. (i) Fluorescence microscopy images of HEK293T cells 48h after co-expression of FUS-R521H-YFP with either DsRed, DNAJB14-FL, BAG3 or HSF1. Shown are representative fields from  $n=3$  biologically independent experiments. White arrows mark mutFUS aggregates. (j) Microscopy images of HEK293T cells expressing FUS-R518K-YFP co-transfected with DsRed or DNAJB14-FL respectively. Shown are representative fields from  $n=2$  biologically independent experiments. (k) Aggregation modulation scores for FUS-R518K-YFP co-transfected with DNAJB14-FL, BAG3 or HSF1. Data are presented as mean values  $\pm$  SEM  $n=7/3/3$  biologically independent experiments for DNAJB14-FL/BAG3/HSF1 respectively. Dashed lines represent 95% CI as in Fig. 3a. \*\*\* -  $p<0.003$ , empirical p-value (see Methods). Source data are provided as a Source Data file.

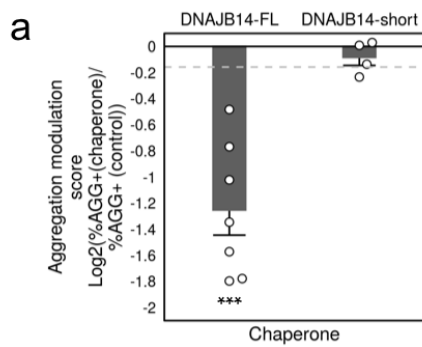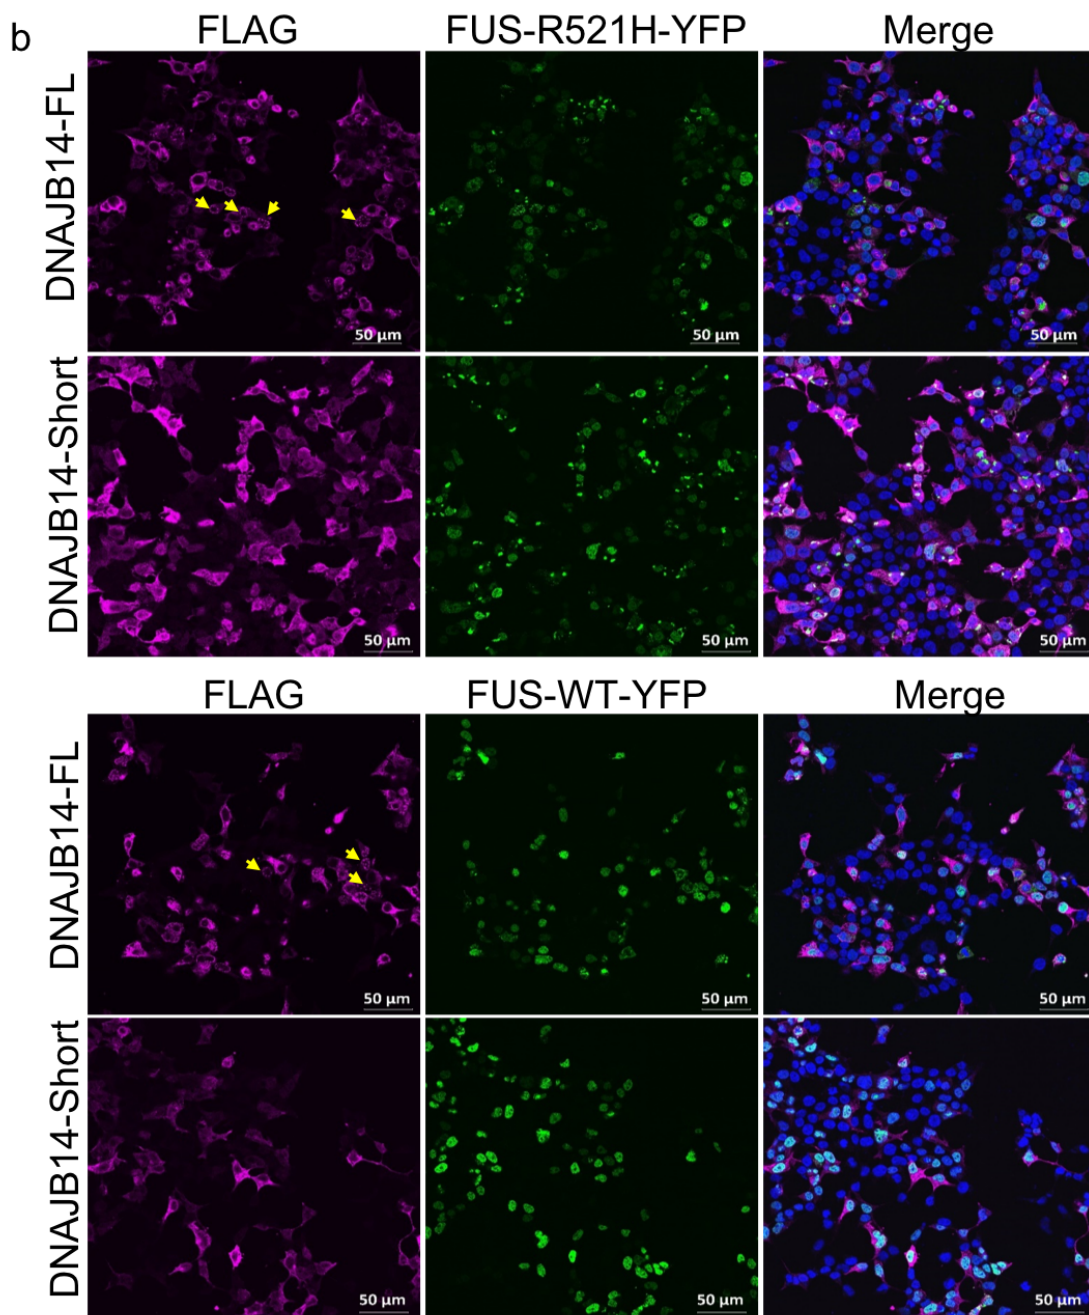

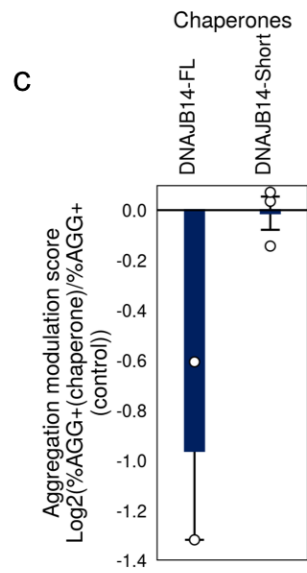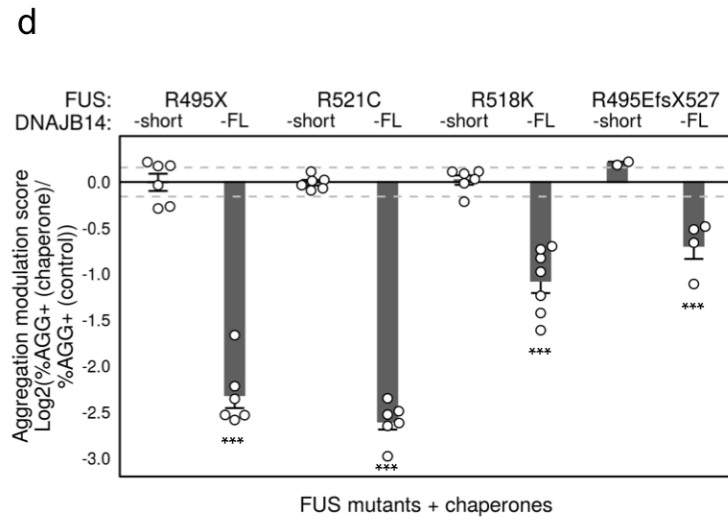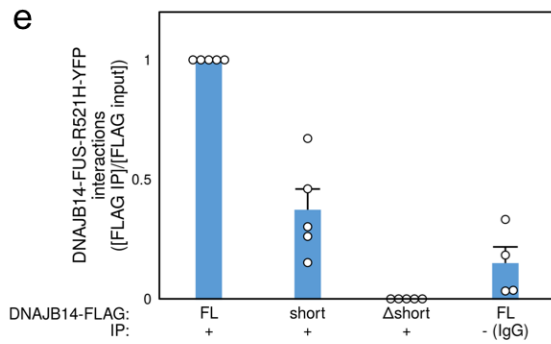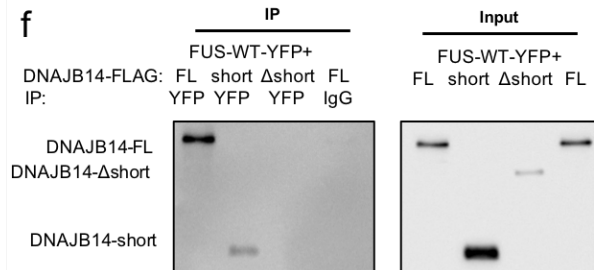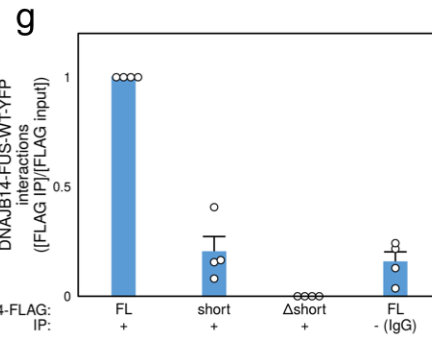

h

FUS-R521H-YFP+B14-FL

FUS-R521H-YFP+B14-short

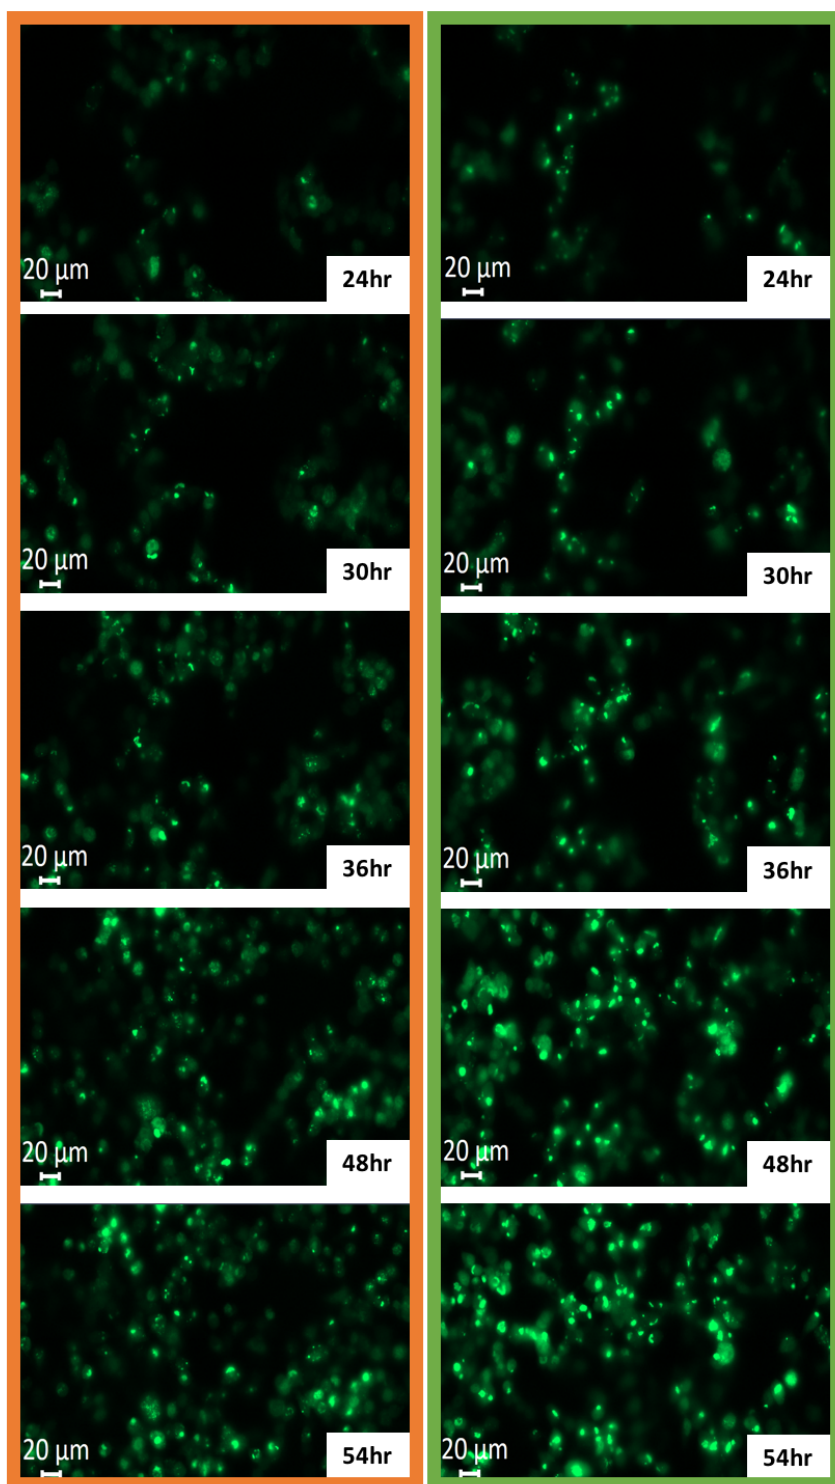

i

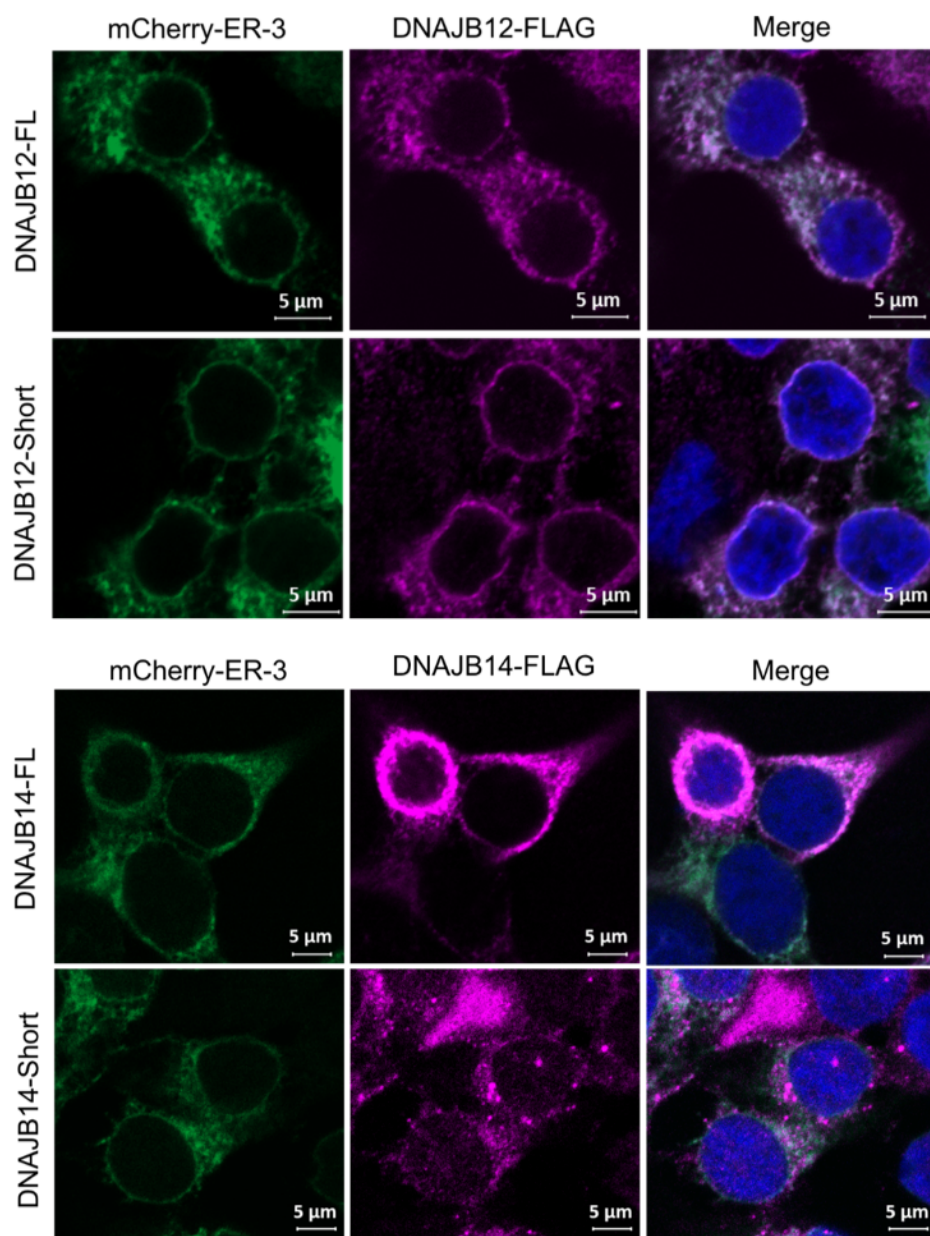

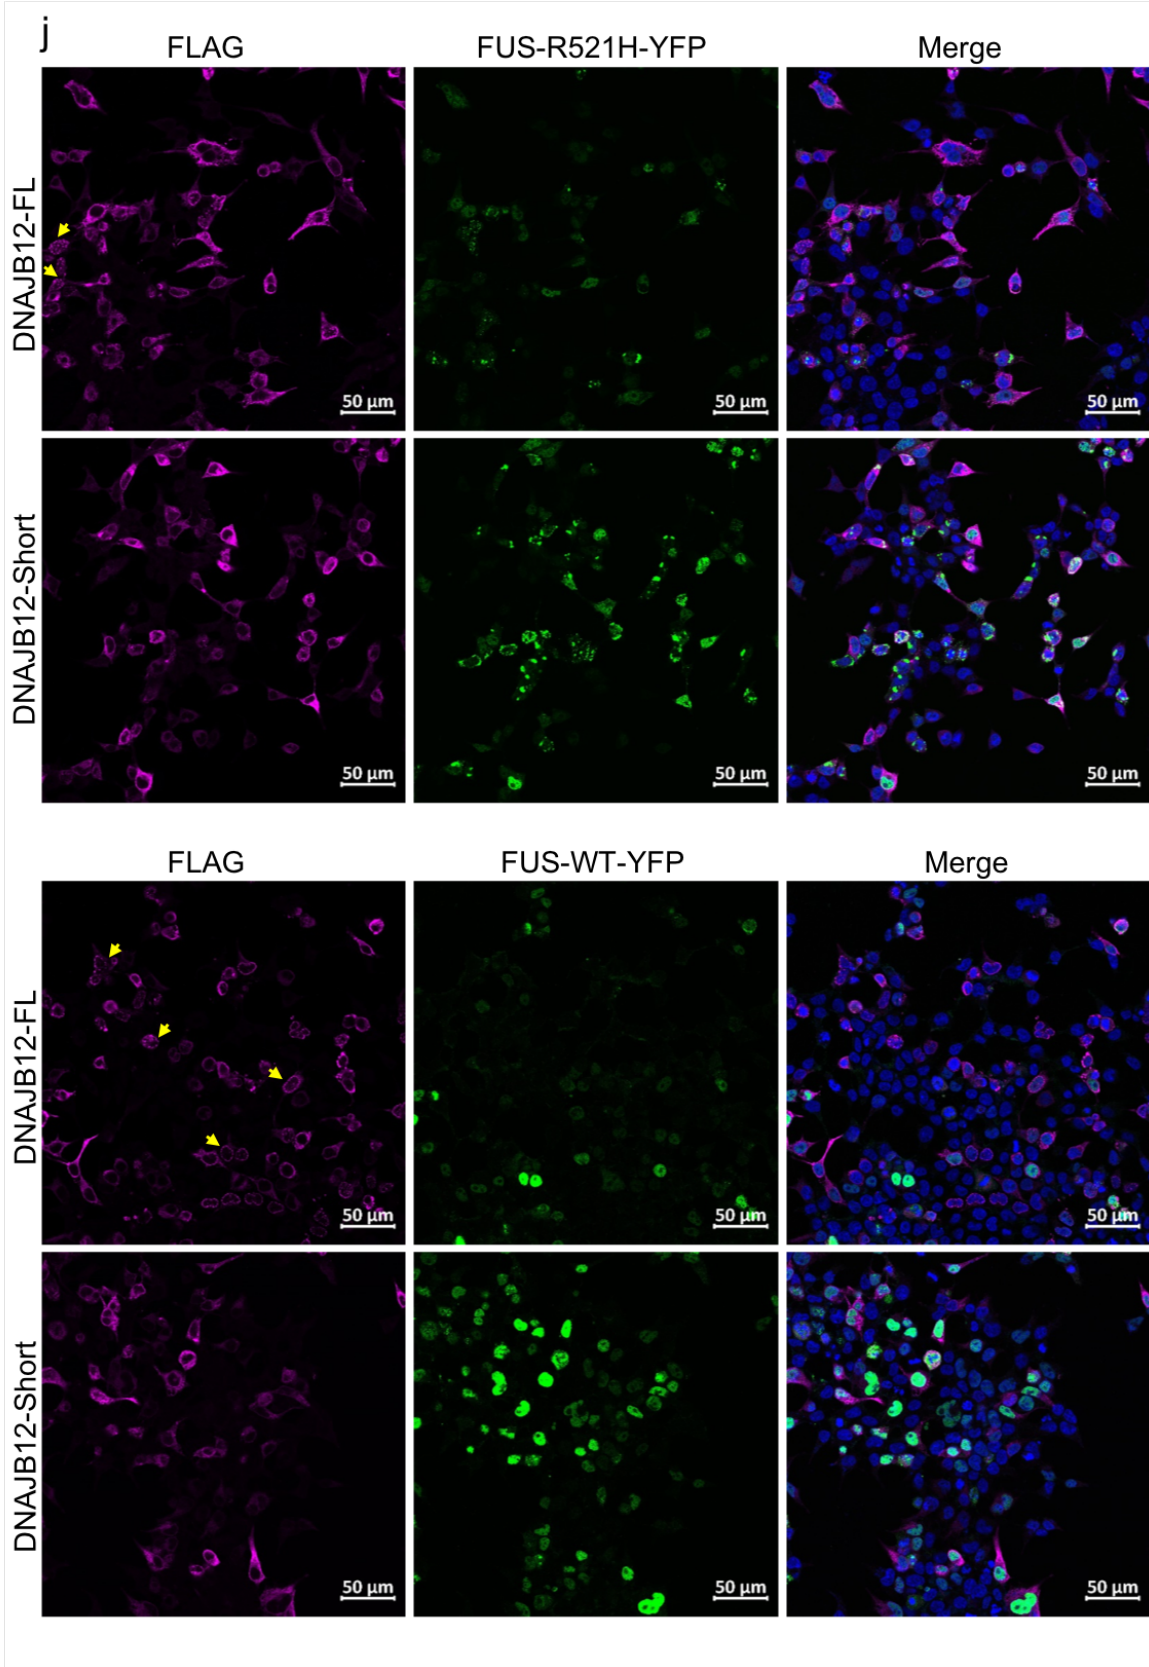

k

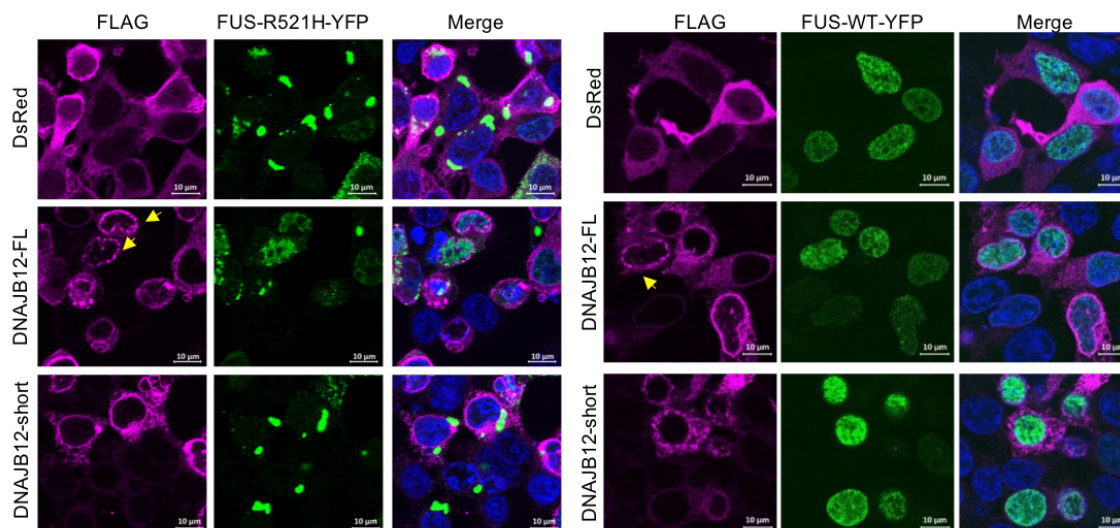

l

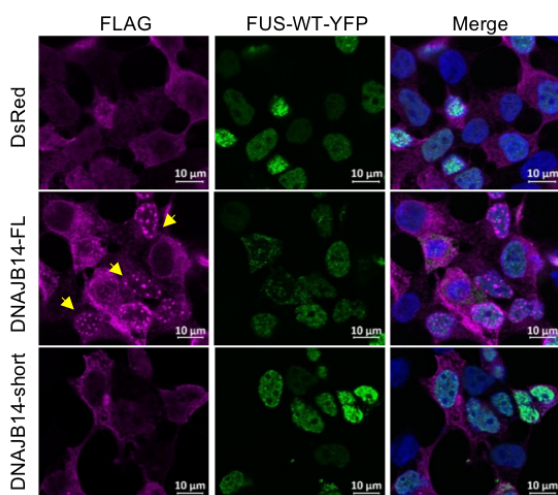

m

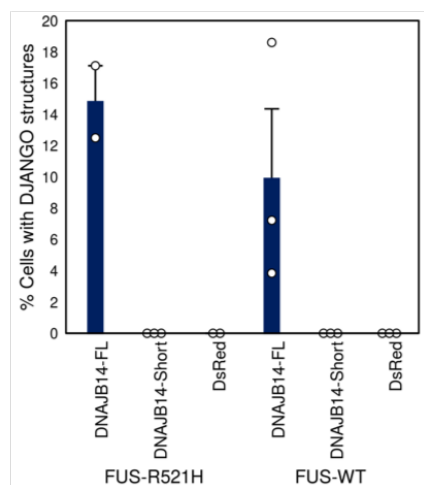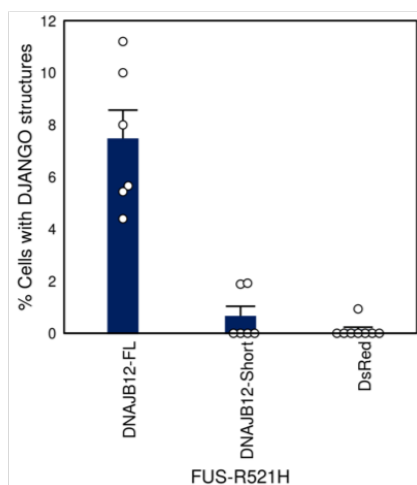

n

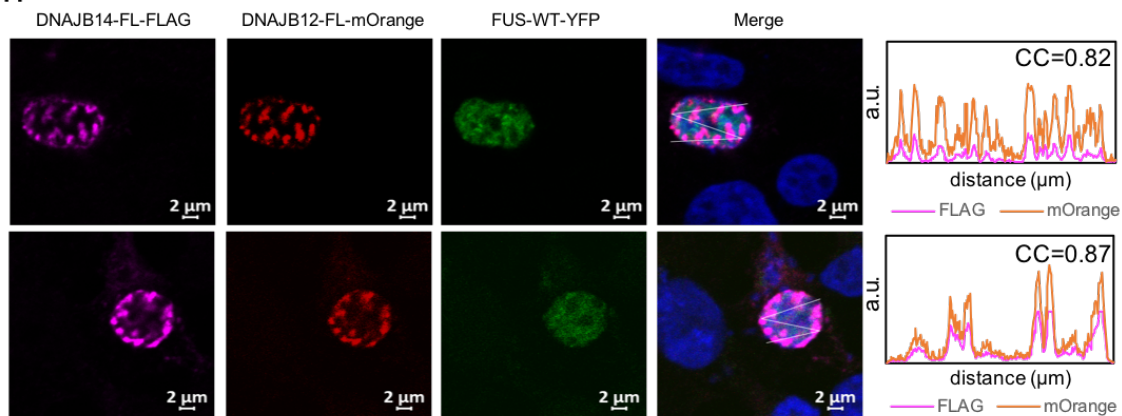

o

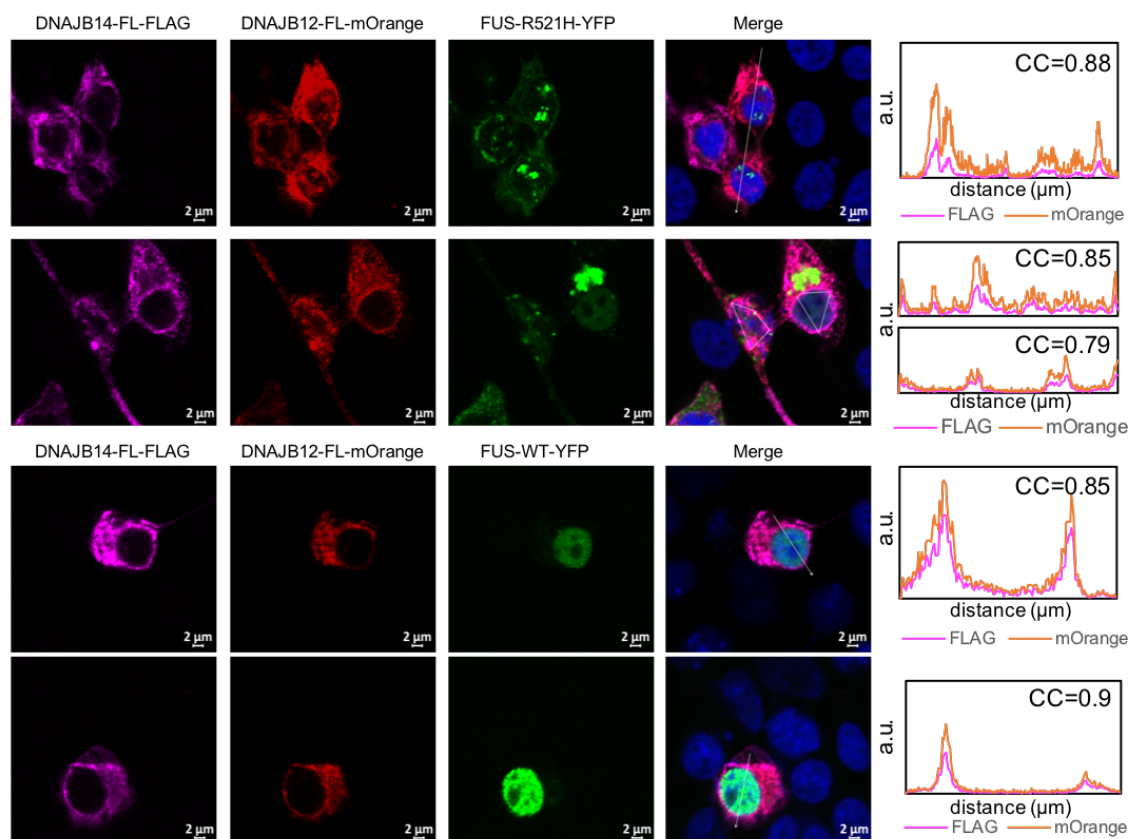

p

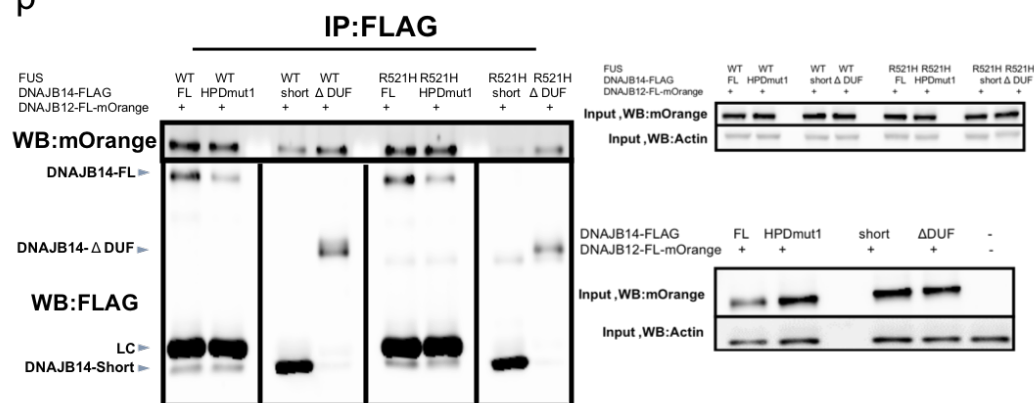

q

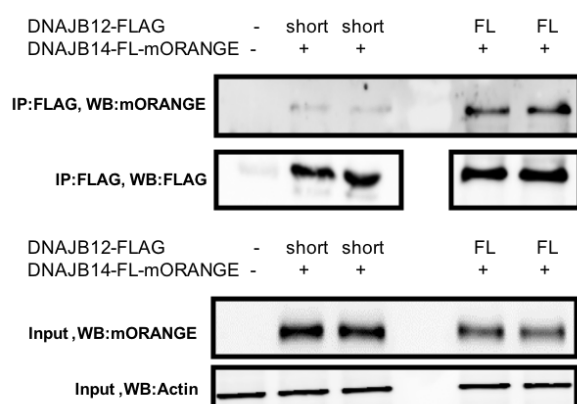

r

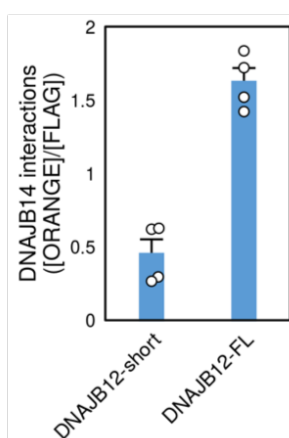

## Supplementary Figure 6: DNAJB14 and DNAJB12 full length isoforms interactions and localization

(a) Aggregation modulation scores for FUS-R521H-YFP cells co-transfected with non-tagged DNAJB14-FL or DNAJB14-short. Data are presented as mean values  $\pm$  SEM of  $n=4$  and  $n=7$  biologically independent samples (for DNAJB14-short and -FL respectively). Dashed lines represent 95% CI. \*\*\* -  $p<0.003$ , empirical p-value (see Methods). Source data are provided as a Source Data file. (b) Confocal microscopy of HEK293T cells co-transfected with DNAJB14-FL or DNAJB14-short (pink) together with FUS-R521H or FUS-WT (green). Some DJANGO structures are indicated by yellow arrows. No DJANGOs are observed in the short isoform. Shown are representative fields from  $n=4$  biologically independent experiments. (c) Image analysis quantification recapitulated the aggregation modulation scores of DNAJB14-FL vs. DNAJB14-short (see Methods). Images were taken using confocal microscopy. Data are presented as mean values  $\pm$  SEM of  $n=2$  biologically independent samples of DNAJB14-FL (with 72 and 75 cells),  $n=3$  biologically independent samples of DNAJB14-short (with 128, 133 and 38 cells), normalized to  $n=2$  biologically independent samples of DsRed controls (with 90 and 126 cells). Source data are provided as a Source Data file. (d) Aggregation modulation scores for the different FUS mutants (as shown) co-transfected with either DNAJB14-FL or DNAJB14-Short. Data are presented as mean values  $\pm$  SEM of  $n=2$  (for R495EfsX527+DNAJB14-short),  $n=4$  (for R495EfsX527+DNAJB14-FL), and  $n=7$  (for R518K+DNAJB14-FL) and  $n=6$  (for all the rest) biologically independent samples for . Dashed lines represent 95% CI. \*\*\* -  $p<0.003$ , empirical p-value (see Methods). Source data are provided as a Source Data file. (e) Signal intensity quantification of DNAJB14 isoforms binding to FUS-R521H-YFP, each normalized to the input FLAG signal. Data are presented as mean values  $\pm$  SEM of  $n=5$  experiments for FL and short,  $n=4$  for  $\Delta$ short and IgG. Densitometry was performed using Fiji. Source data are provided as a Source Data file. (f-g) Co-IP (f) showed that DNAJB14-FL interacted with FUS-WT-YFP while DNAJB14-short showed a minimal level of interaction. (g) As in (e), for FUS-WT-YFP, data are presented

as mean values  $\pm$  SEM of  $n=5$  biologically independent experiments. Source data are provided as a Source Data file. (h) Live cell fluorescence microscopy imaging using automated boxed microscope (see Methods). Cells were co-transfected with FUS-R521H-YFP and DNAJB14-FL or DNAJB14-short respectively, then were imaged 24h post transfection until 54hrs post transfection. Times are indicated. In the presence of DNAJB14-FL, aggregates are generated in lower rates, and rarely disappear. Shown are representative fields from  $n=2$  biologically independent movies. (i) ER localization of DNAJB14 (bottom) and DNAJB12 (top), stained with anti-FLAG (pink) – shown via colocalization with the ER marker mCherry-ER-3 (green), containing the signal peptide of CALR (see Methods) in immunofluorescence imaging. Shown are representative cells from  $n=3$  biologically independent samples. (j-k) Same as in (b) for DNAJB12-FL and DNAJB12-short. Shown are representative fields from  $n=2$  biologically independent experiments. (k) IF images as in (j) with larger magnification. (l) IF for DNAJB14-FL and -short together with WT FUS (as in Fig. 4c). (m) Image analysis (see Methods) showed that DNAJB14-short does not form any DJANGO structures. Data are presented as mean values  $\pm$  SEM for  $n=2/2/3$  (FUS-R521H+DNAJB14-FL/DsRed/DNAJB14-short respectively),  $n=3$  (for FUS-WT+DNAJB14-FL/DsRed/DNAJB14-short) and  $n=6/6/8$  (FUS-R521H+DNAJB12-FL/DNAJB12-short/DsRed respectively) biologically independent samples. A similar analysis as also performed for DNAJB12-FL and -short (right panel). Source data are provided as a Source Data file. (n) DNAJB12-FL tagged with mOrange (red) and DNAJB14-FL tagged with FLAG (pink) showing DJANGO structures in cells transfected with the WT FUS. Cross correlation plots are shown together with the correlation coefficient between DNAJB14 and DNAJB12. (o) The FL isoforms of both DNAJB12 and DNAJB14 are shown to also co-localize in cells where they demonstrate an ER localization pattern, both in the presence of FUS-R521H (green, top) and FUS-WT (green, bottom) cells. Cross correlation plots are shown together with the correlation coefficient (CC) between DNAJB14 and DNAJB12. (p) As in Fig. 4f, in the presence of WT and mutFUS. This represents 2 biologically independent replicates to Fig. 4f. Also shown are input WBs for Fig. 4f and this panel. White band (lane 3,6,9) shows a molecular weight marker of 70KDa. Source data are provided as a Source Data file. (q-r) Co-IP (q) showed that DNAJB12-FL interacts with DNAJB14-FL (tagged with mOrange), while DNAJB12-short had negligible interaction with DNAJB14-FL. We note that the sizes of the two isoforms are very different, as seen in Fig. 2d, and S6p. White band (lane 4) shows a molecular weight marker of 70KDa. Representative WB is shown out of  $n=3$  biologically independent experiments. Source data are provided as a Source Data file. (r) Quantification of interaction was performed using Fiji, where densitometry of mOrange band was normalized to that of the FLAG band (see Methods). Data are presented as mean values  $\pm$  SEM of  $n=4$  biologically independent samples. Source data are provided as a Source Data file.

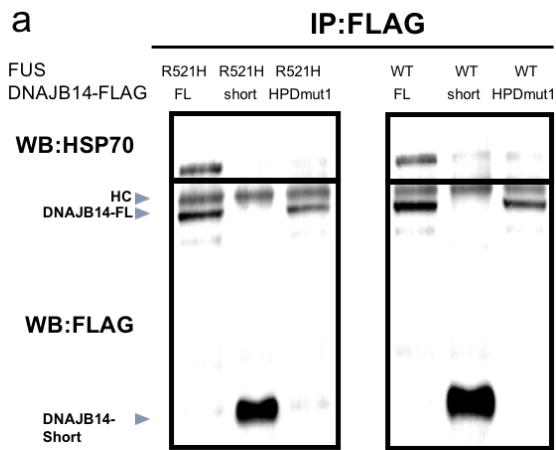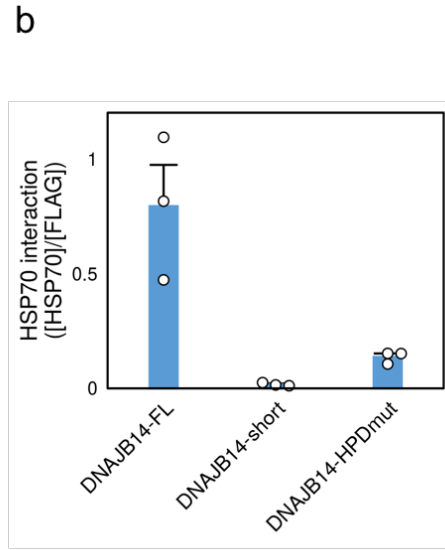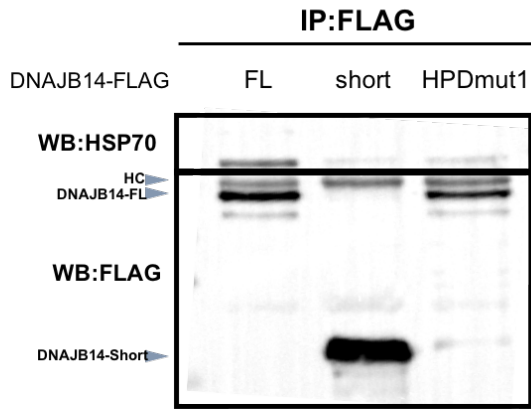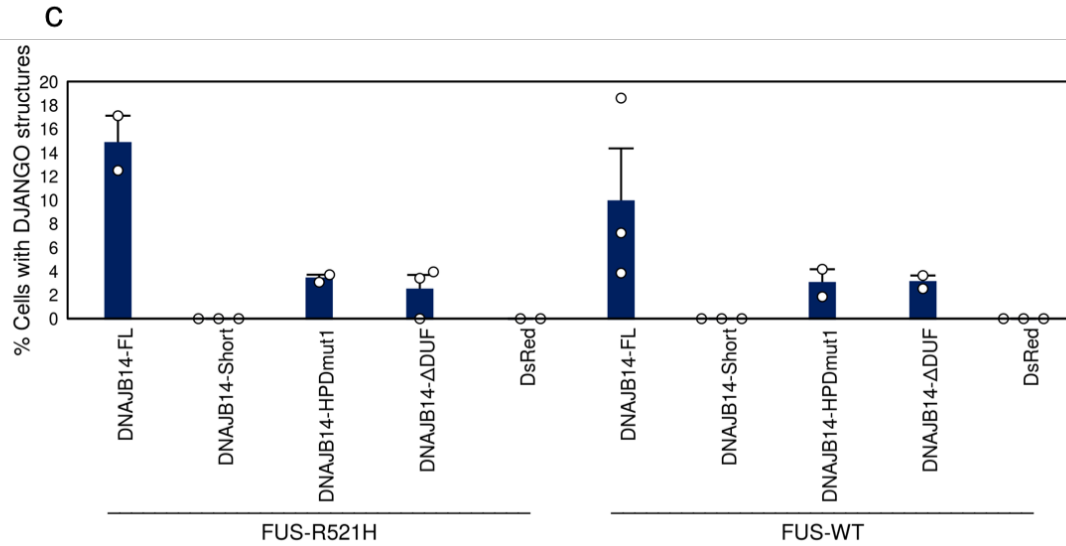

d

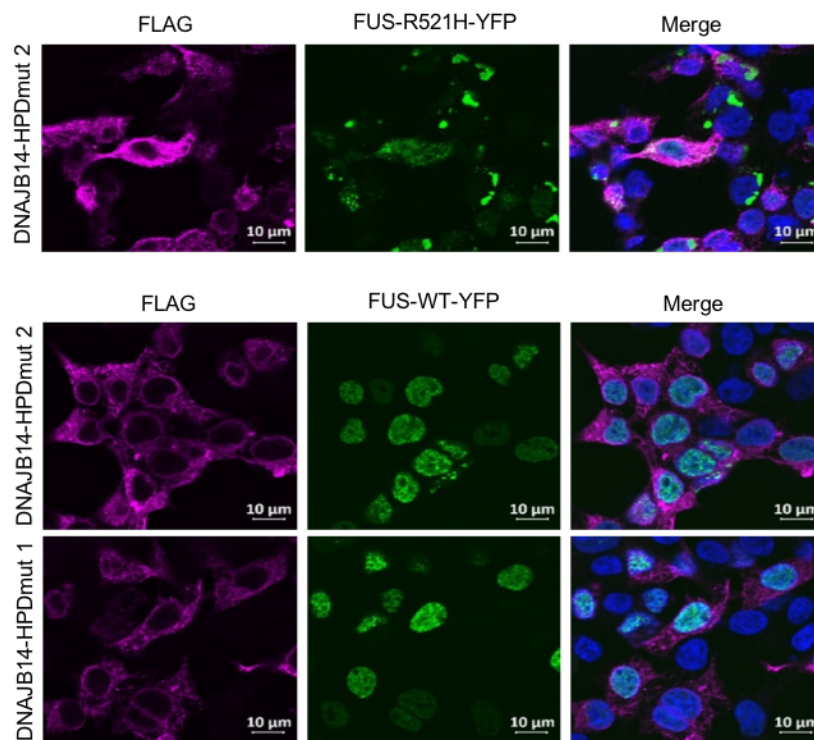

e

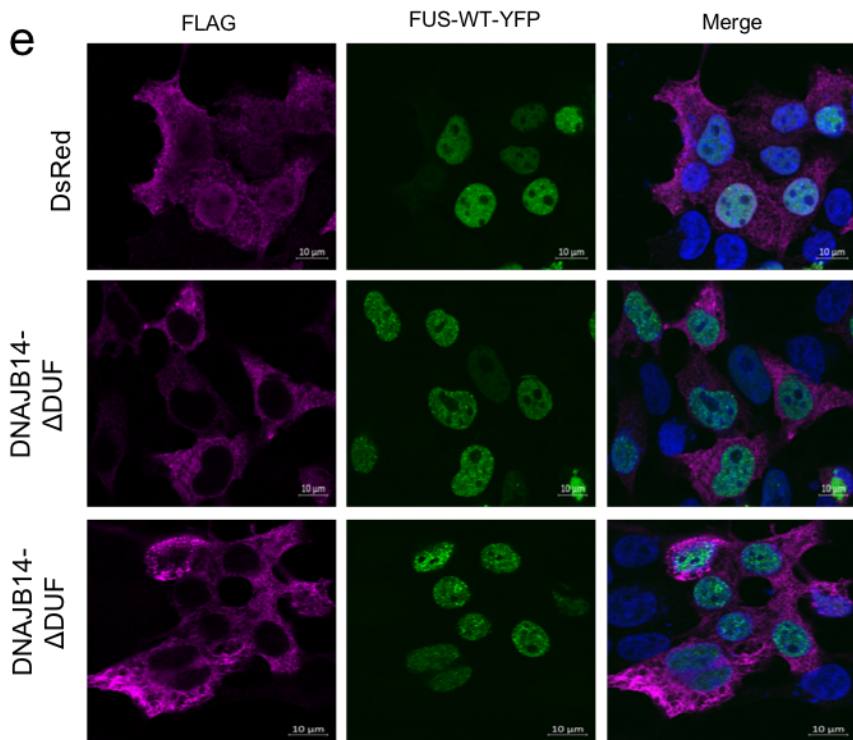

**Supplementary Figure 7: DNAJB14 isoforms interact differently with the endogenous HSP70.**

(a) Co-IP of cells co-transfected with either WT or mutant FUS with three different isoforms of FLAG tagged DNAJB14 (FL, short, HPDmut1). Interaction between exogenous DNAJB14 and the endogenous

HSP70 is shown in the upper panel. DNAJB14 signal was assayed using anti-FLAG antibody WB in the lower panel. HC-Heavy chain. Source data are provided as a Source Data file. (b) Signal intensity quantification of HSP70 bound to the DNAJB14 different isoforms, all normalized to FLAG signal. Data are presented as mean values  $\pm$  SEM of n=3 biologically independent samples shown in panel a. Densitometry was performed using Fiji. Source data are provided as a Source Data file. (c) Percentage of DJANGOs containing cells was calculated using image analysis of IF images, as in Fig. S6m, showing the same data but with additional mutants. Data are presented as mean values  $\pm$  SEM for n=2/3/2/3/2 (FUS-R521H+DNAJB14-FL/-short/-HPDmut1/- $\Delta$ DUF/DsRed respectively), n=3/3/2/2/3 (FUS-WT+DNAJB14-FL/-short/-HPDmut1/- $\Delta$ DUF/DsRed respectively) biologically independent samples. Source data are provided as a Source Data file. (d-e) As in Fig. 4c, for DNAJB14-HPDmut2 with FUS-R521H-YFP, and both HPD mutants together with WT-FUS (d), as well as DNAJB14  $\Delta$ DUF with WT-FUS(e). Shown are representative fields from n=4/2 biologically independent experiments (for d and e respectively).

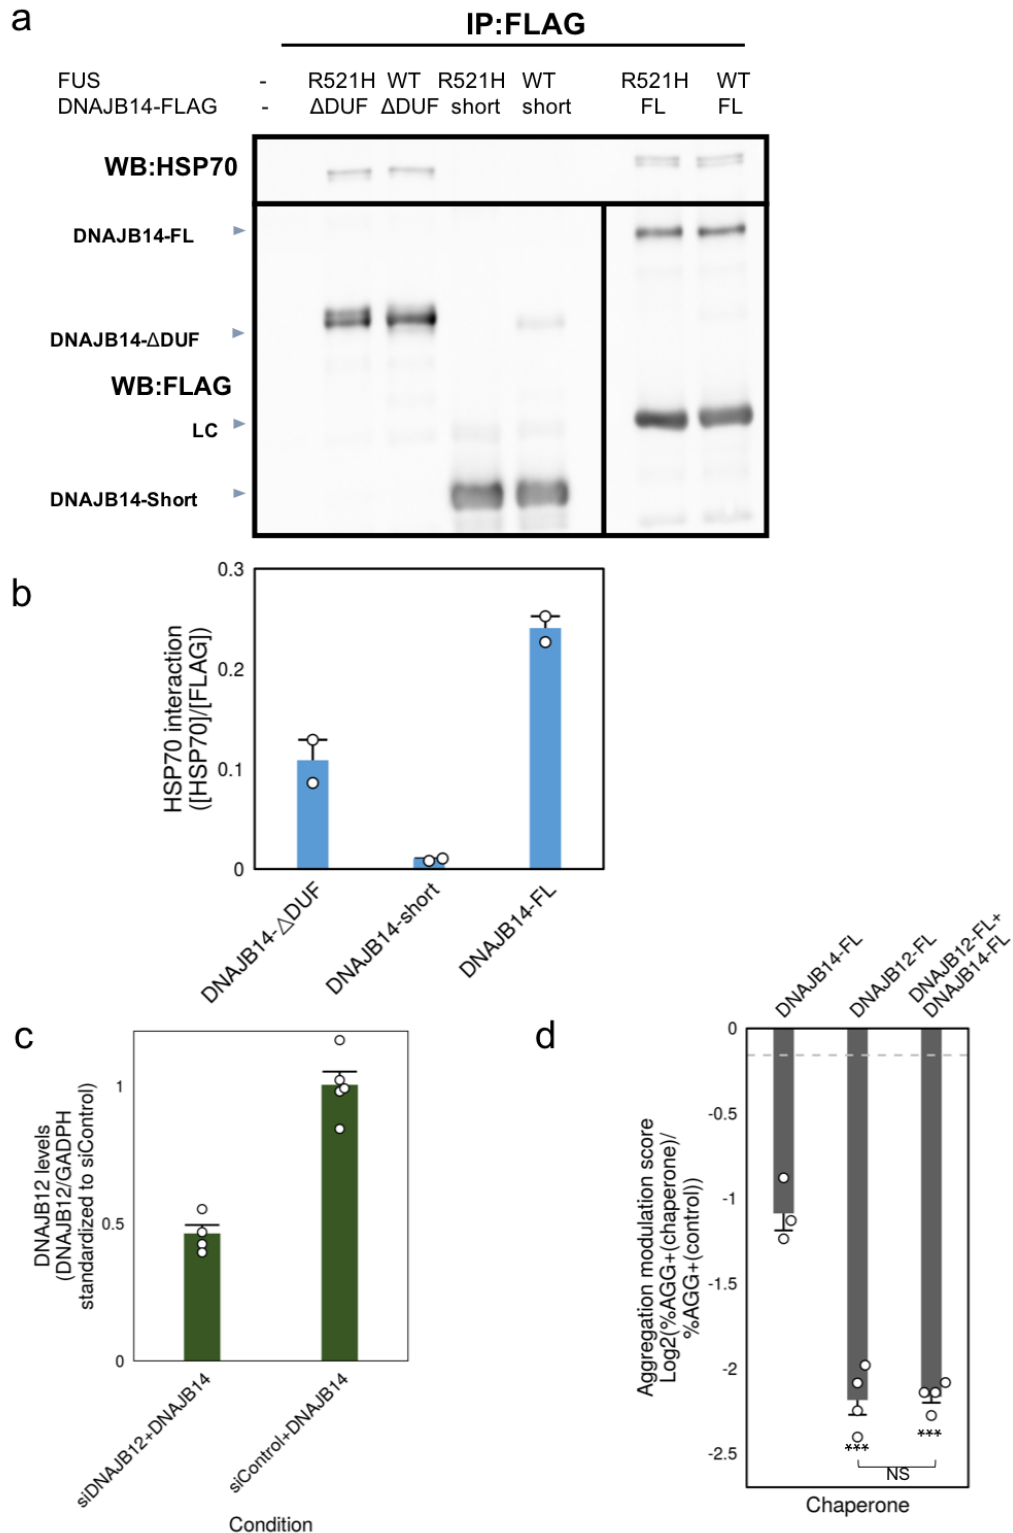

**Supplementary Figure 8: DNAJB14 - DNAJB12 complex inter-dependence in protection from mutant FUS aggregation**

(a) Co-IP of cells co-transfected with either FUS-WT or FUS-R521H together with FLAG tagged DNAJB14 isoforms (FL, short, or  $\Delta$ DUF). DNAJB14 isoforms were pulled down using anti-FLAG antibody. Interaction between HSP70 and DNAJB14 isoforms was assayed using WB for endogenous HSP70 (upper panel). DNAJB14 signal was assayed by anti-FLAG antibody WB for the different isoforms (lower panel, LC- Light chain) see arrows: Membrane containing DNAJB14-FL– used with secondary antibody LC fragment specific. Membrane containing DNAJB14-short and  $\Delta$ DUF – used with secondary

antibody FC fragment specific. Source data are provided as a Source Data file. (b) Quantification HSP70 interactions, HSP70 bands divided by FLAG band intensities, was performed using Fiji. Data are presented as mean values  $\pm$  SEM of  $n=2$  biologically independent samples from panel a. Source data are provided as a Source Data file. (c) Fold changes in mRNA levels of the DNAJB12-FL gene normalized to the GAPDH were assayed using qPCR for DNAJB12 knockdown samples (siDNAJB12) and control samples (siControl). Data are presented as mean values  $\pm$  SEM of  $n=3$  biologically independent experiments, each standardized to the siControl sample. Source data are provided as a Source Data file. (d) Aggregation modulation scores for HEK293T cells transfected with FUS-R521H-YFP and DNAJB12-FL, DNAJB14-FL or both. The mutual overexpression of both DNAJB12-FL and DNAJB14-FL shows a similar extent of aggregation protection as that of DNAJB12-FL alone. Data represent mean  $\pm$  SEM for  $n=4/4/3$  (for DNAJB12+DNAJB14/DNAJB12/DNAJB14 respectively) biologically independent samples. Dashed lines represent 95% CIs as in Fig. 3a. \*\*\* -  $p<0.003$ , empirical p-value (see Methods).

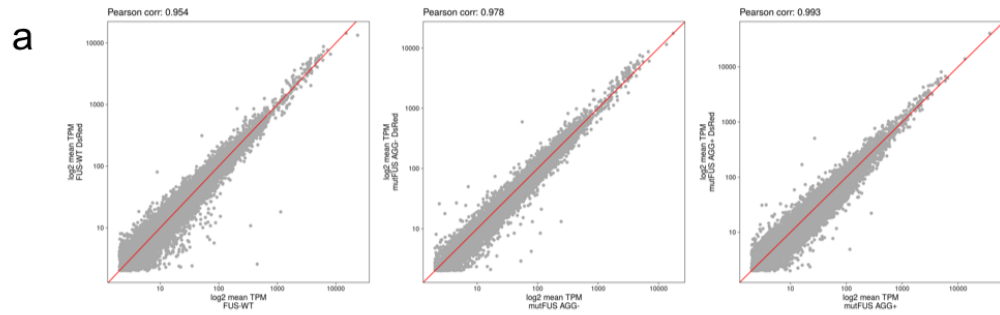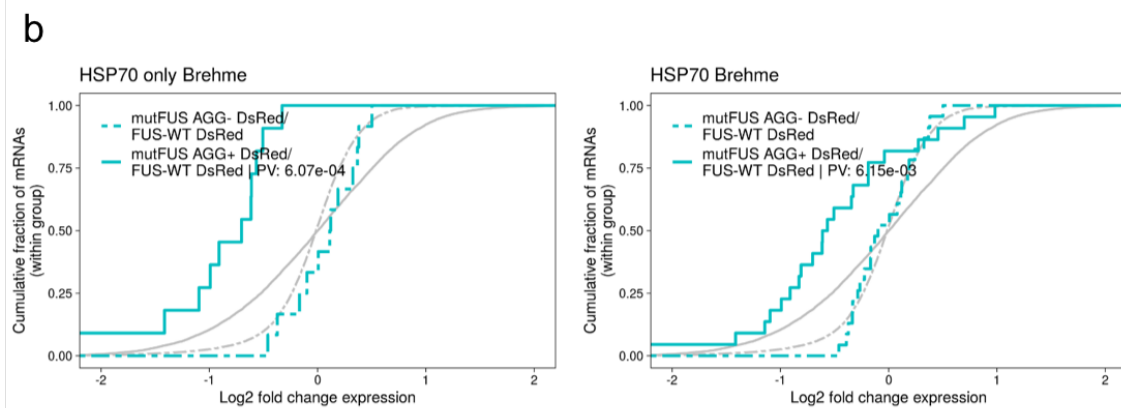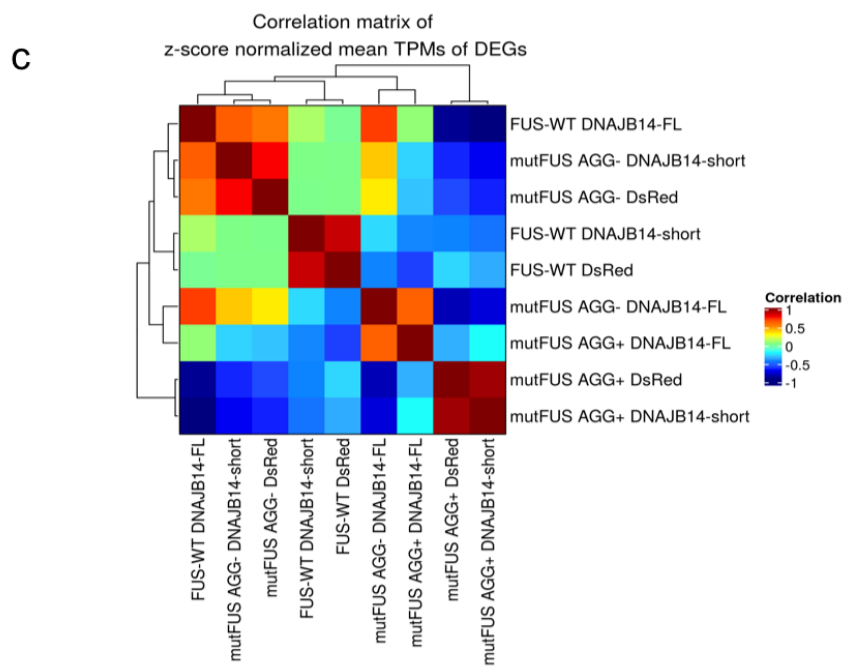

d

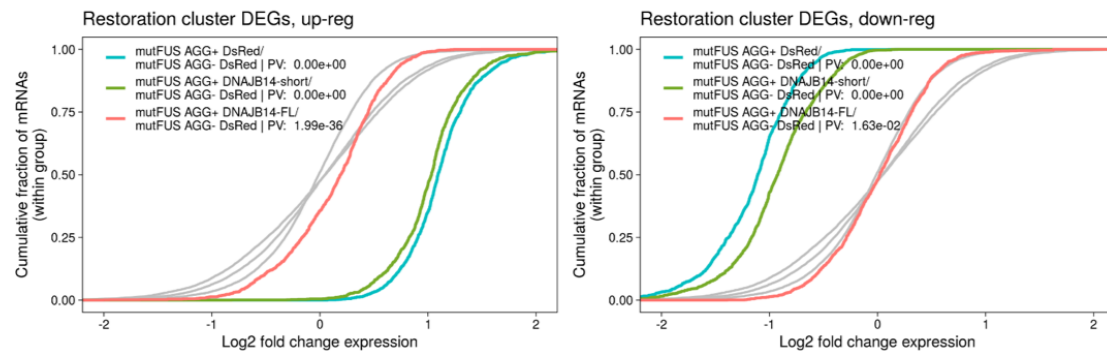

e

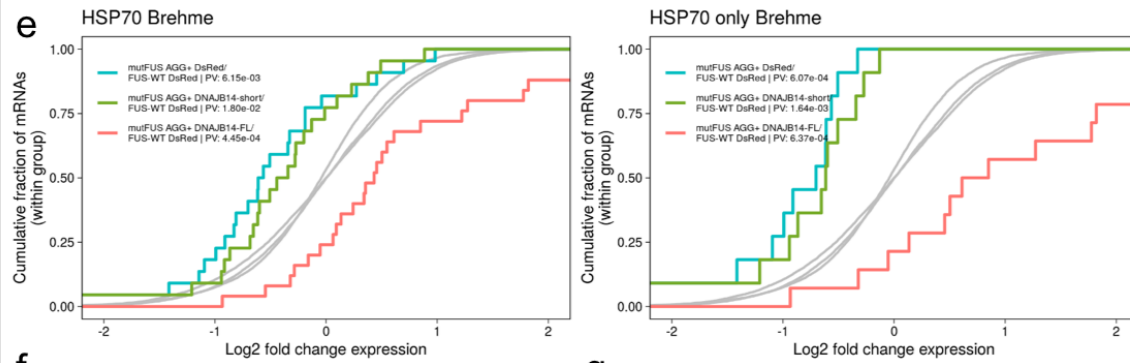

f

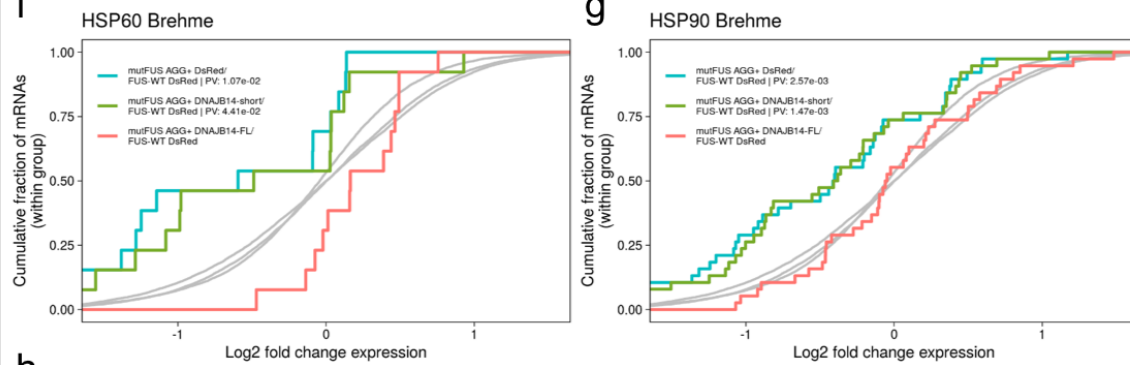

h

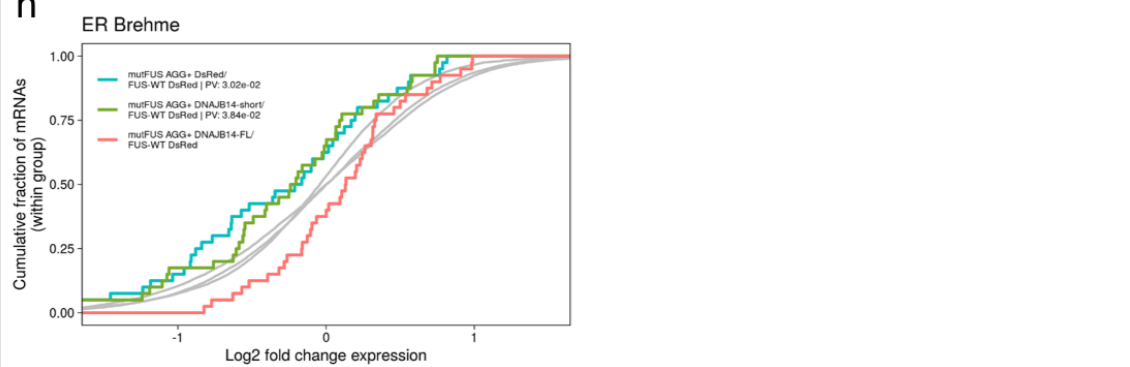

i

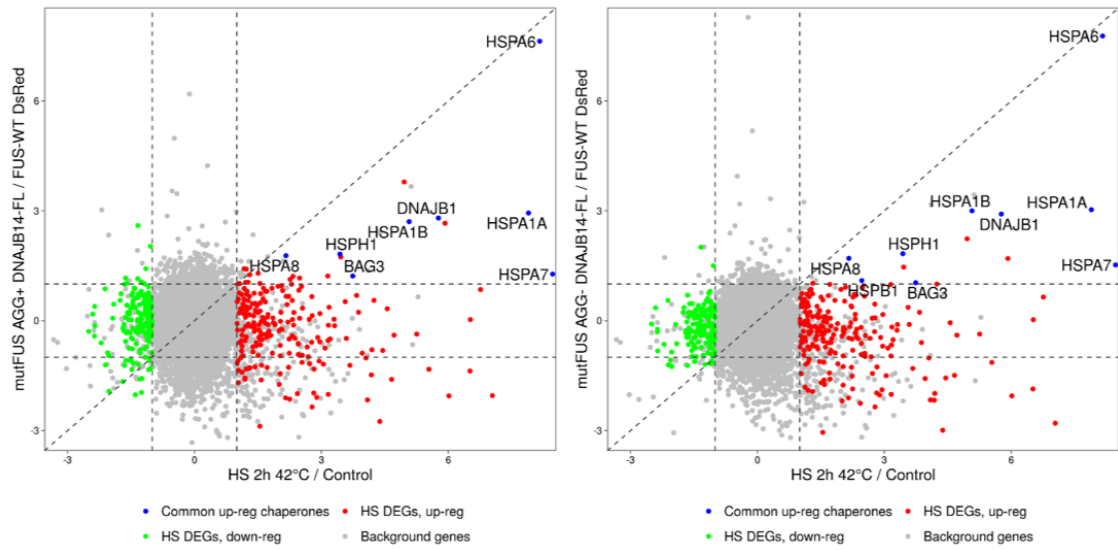

j

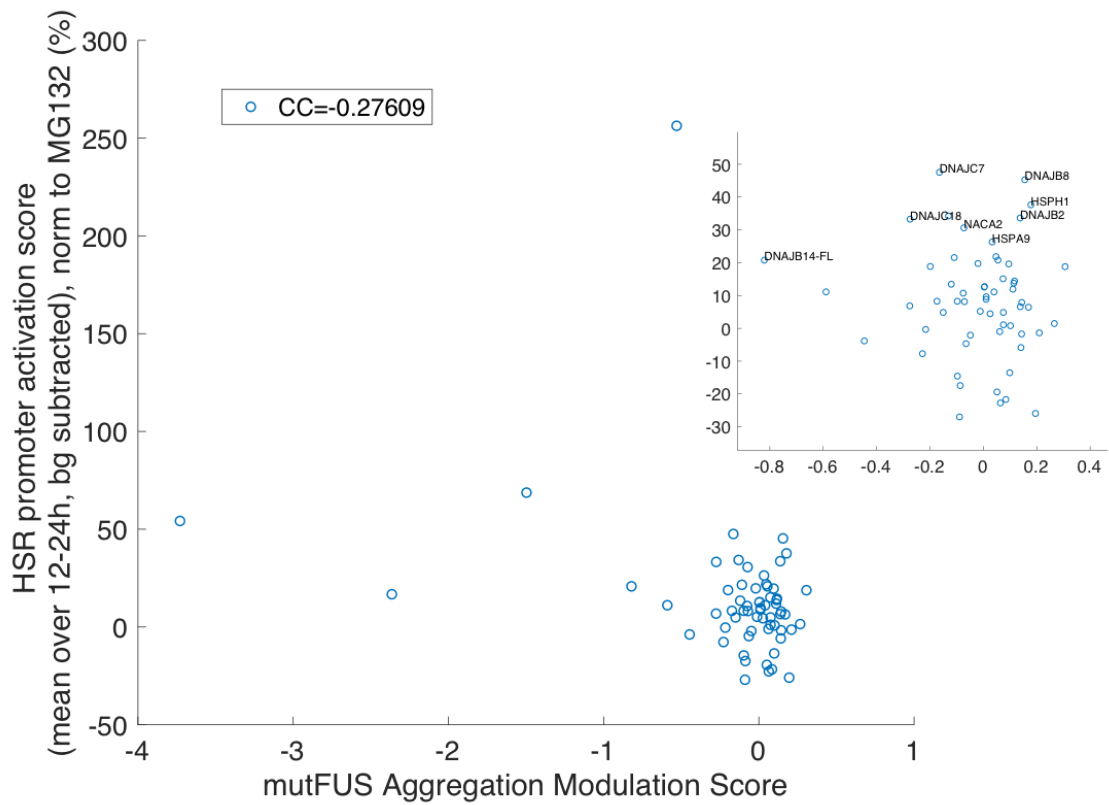

k

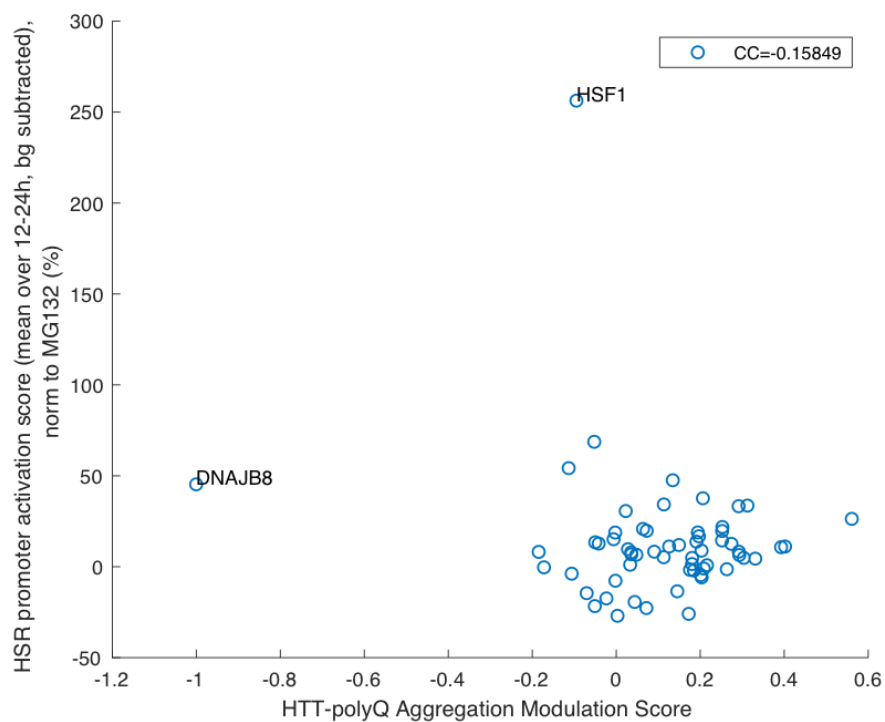

l

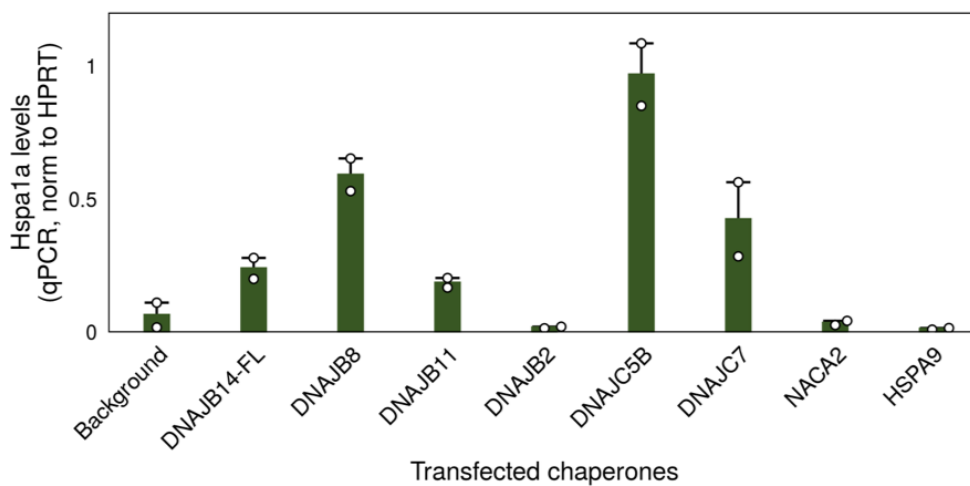

m

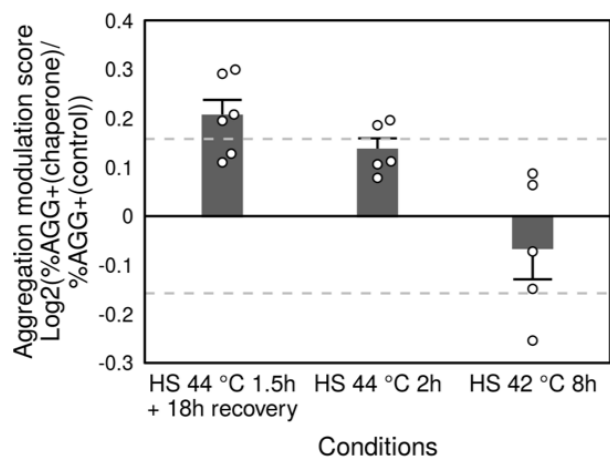

## Supplementary Figure 9: DNAJB14-FL restores deteriorated proteostasis caused by mutFUS aggregation

(a) Scatter plots show high correlation between the two RNA-seq experiments, of mRNA expression in FUS-WT or mutFUS expressing cells (either aggregate-containing, AGG+, or diffused, AGG-) either expressed alone (as in Fig. 1), or with DsRed co-expression (Fig. 6). (b) Expression of genes belonging to the HSP70 family of chaperones<sup>3</sup> was significantly repressed in cells containing mutFUS aggregates co-expressing DsRed (AGG+, solid blue line), while no such repression was seen in cells with diffused expression of mutFUS (AGG-, dashed blue line). Plots show the cumulative distribution function (CDF, y-axis) of LFC values belonging to the HSP70 chaperone family (using two definitions, see Methods), compared to the background CDF of all expressed mRNAs (background, in grey lines). P-value for the differences of each sample compared to the background distribution was calculated using t-test (two-sided), and is indicated in the legend when significant. (c) Clustergram of the correlation matrix of z-score normalized mean TPM values of all differentially expressed genes (DEGs) in the experiment, shows very high correlation between cells co-expressing DNAJB14-short and cells co-expressing DsRed. (d) CDF plots (CDF, y-axis) of the Log2 Fold Change (LFC) values of different samples divided by mutFUS AGG-DsRed, show that co-expression of DNAJB14-FL in mutFUS AGG+ cells (red) restores the distribution of mRNA expression changes that occurred in the presence of mutFUS AGG+ cells in DsRed (blue) or DNAJB14-short (green) co-expressing cells, almost to the background (grey) distribution. Left panel – red cluster from Fig. 6a, right panel – blue cluster from Fig. 6a. p-values were calculated as in (b). (e-h) CDF plots (CDF, y-axis) as in (d), but for different chaperone families (HSP70, HSP60s, HSP90s and ER-related chaperones, as defined by Brehme et al.<sup>3</sup>) show that co-expression of DNAJB14-FL in mutFUS AGG+ cells restored the down-regulation in the expression of these chaperones in mutFUS AGG+ cells co-expressing DsRed or DNAJB14-short. (i) Scatter plots show no correlation in mRNA expression changes between cell subjected to heat stress (X-axis) and mutFUS AGG+ (left panel) or AGG- (right panel) cells co-expressing DNAJB14-FL. (j-k) HSR promoter activation score (Y-axis, see Methods) vs. mutFUS aggregation modulation scores (j) or HTT-polyQ Aggregation modulation scores (k) (X-axis), show no correlation. Pearson correlation coefficient (CC) is presented. Inset – zoom in on the cloud around the zero point, indicating some specific chaperones. (l) qPCR of HEK293T cells transfected with each one of the different chaperones showing Hspa1a expression (normalized to HPRT). Data are presented as mean values +/- SEM for n=2 biologically independent experiments. Source data are provided as a Source Data file. (m) HEK293T cells co-transfected with FUS-R521H-YFP and DsRed, and then treated with different heat stress regimens; Heat shock of 44C for 1.5h with additional 18h recovery at 37C, 44C for 2h, or 42C for 8h, followed by PulSA analysis at 48h post transfection and right after the treatment. All three regimens showed no aggregation amelioration. Data are presented as mean values +/- SEM for n=6 biologically independent samples for the recovery experiment, and n=5 for 2h at 44C and 8h at 42C. Source data are provided as a Source Data file.

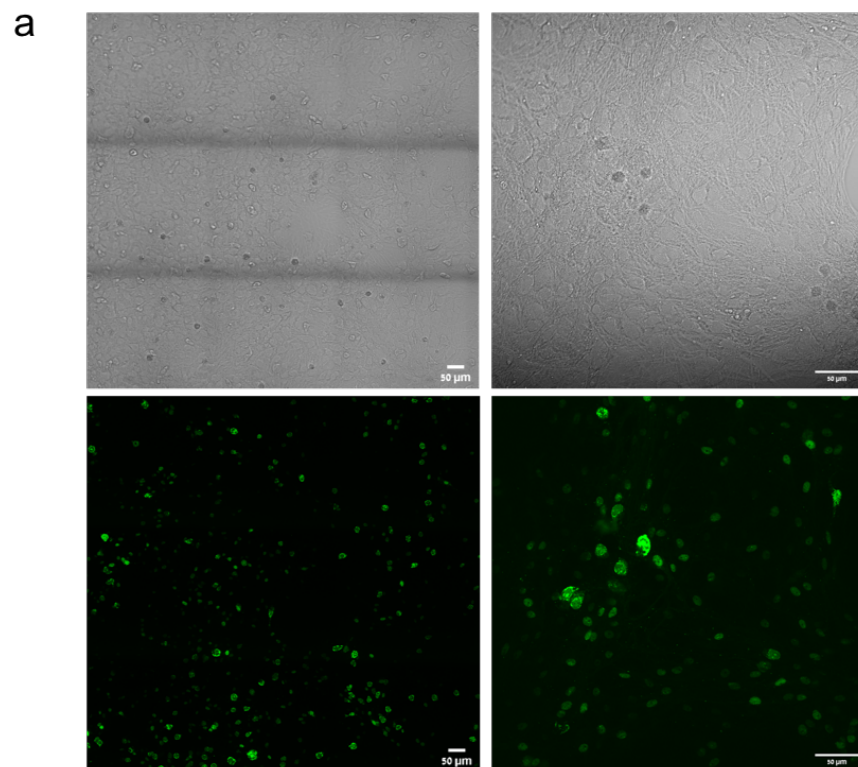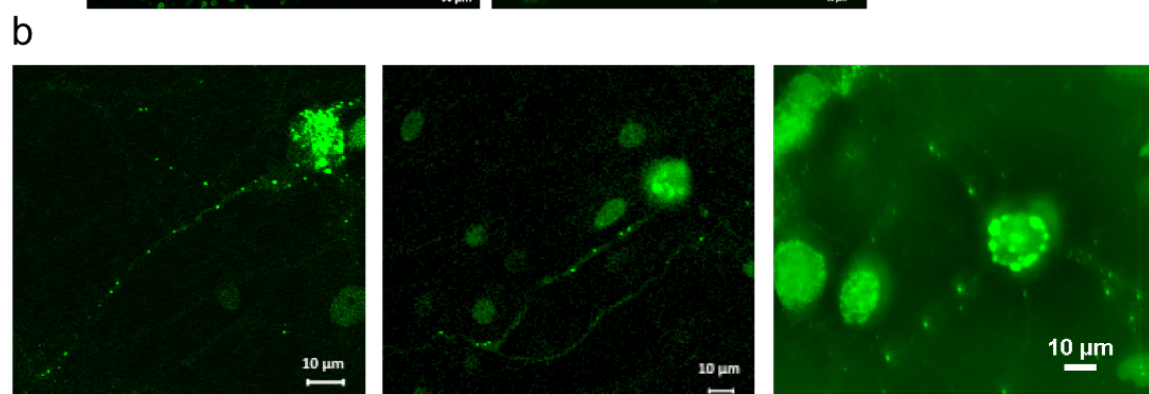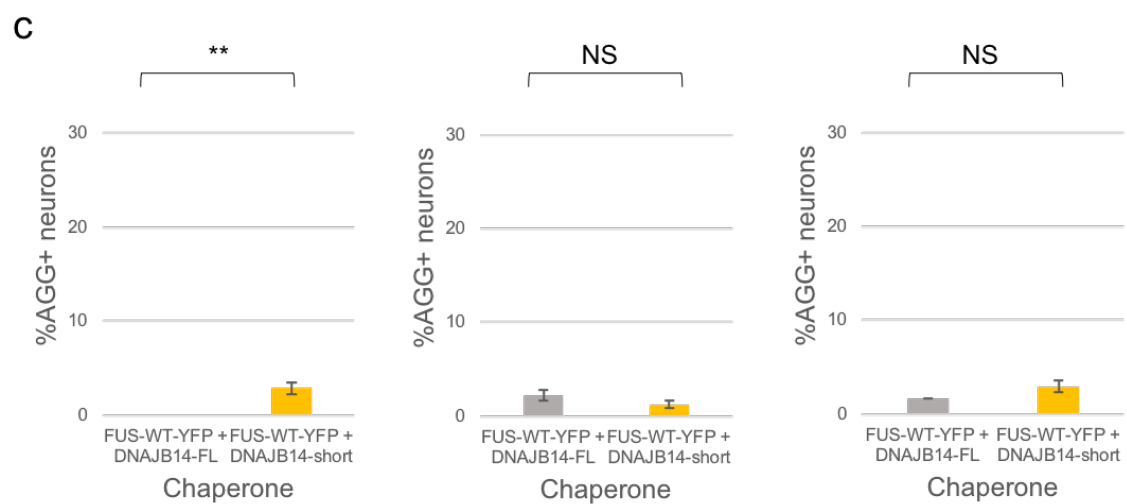

d

FUS-WT-YFP+DNAJB14-short

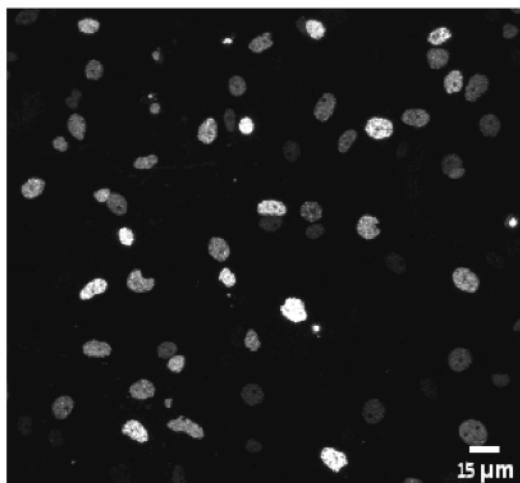

FUS-WT-YFP+DNAJB14-FL

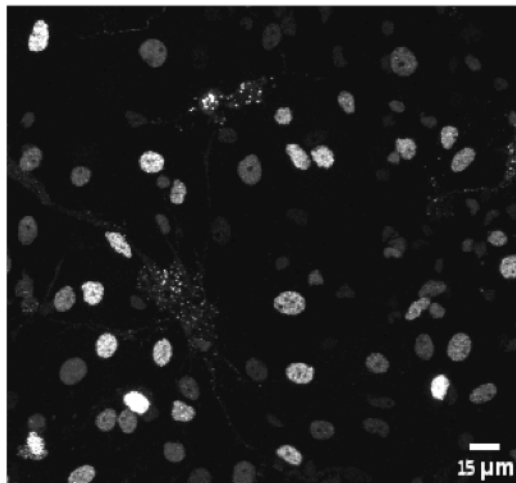

e

FUS-R521H-YFP+DNAJB14-short

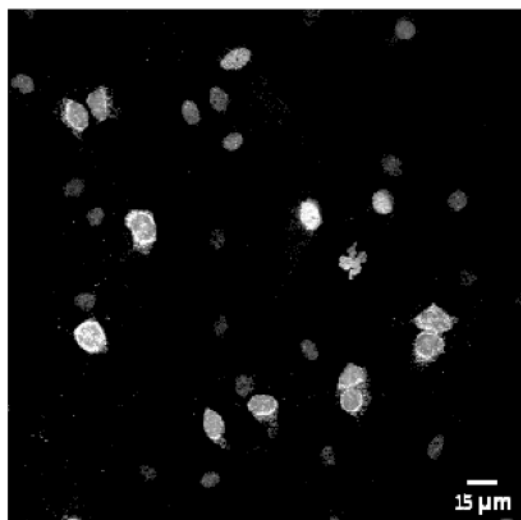

FUS-R521H-YFP+DNAJB14-FL

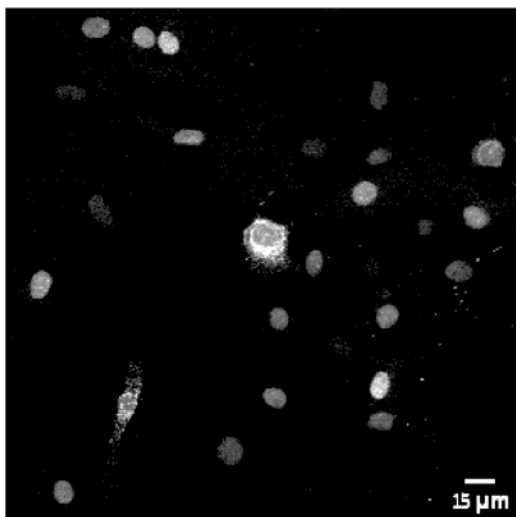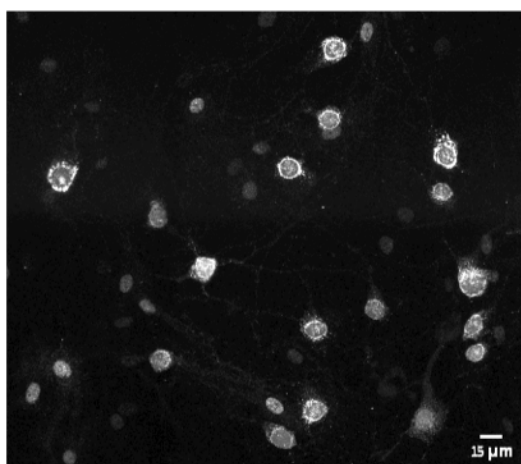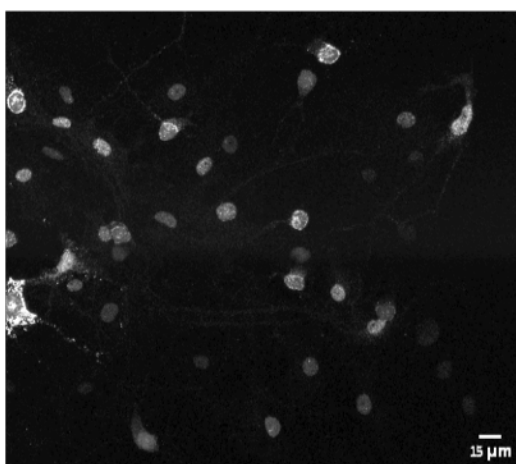

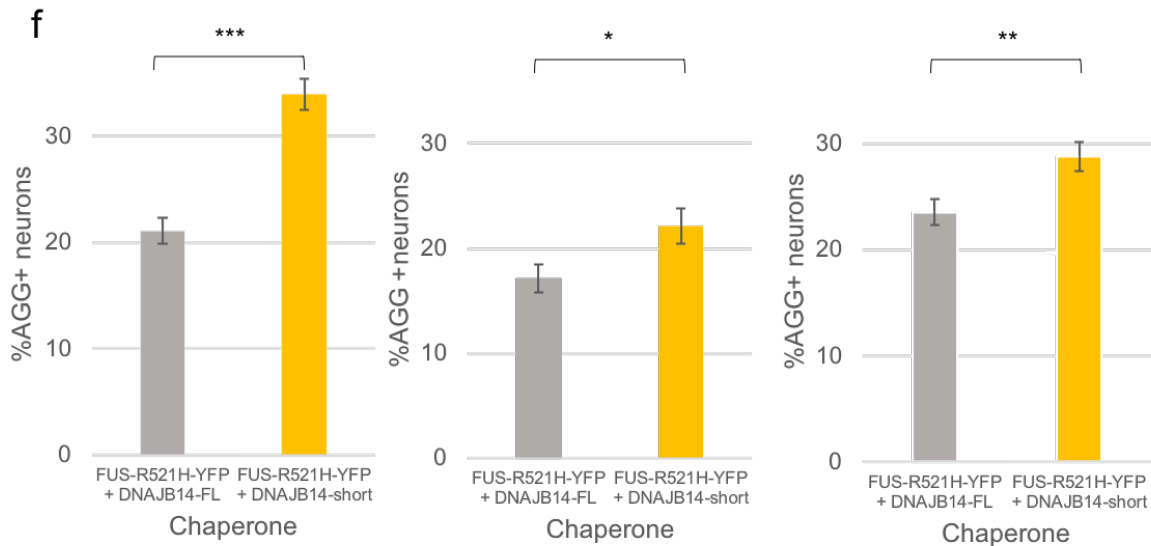

### Supplementary Figure 10: DNAJB14 isoforms show differential modulation of mutant FUS aggregation in primary neurons.

(a-b) Bright field (top) and fluorescence confocal microscopy of live neuronal cultures infected with FUS-R521H-YFP using the AAV2 viral system. (a) Mutant FUS-R521H-YFP can also be observed in neuronal projections. (b) Images were taken either using confocal microscopy (left and middle) or using the HDR software module on a regular Nikon microscope to integrate different exposure times for different regions in the same image (right panel). Shown are representative fields from  $n=5$  biologically independent experiments. (c) Image analysis of thousands of live neurons using confocal microscopy images in FUS-WT-YFP expressing neurons, co-infected with either DNAJB14-FL or DNAJB14-short. Cells were infected with both FUS-WT-YFP and DNAJB14-FL or DNAJB14-short containing viruses at day 5 of culture (titer matched), and imaged six days later. Data are presented as mean values  $\pm$  SEM of  $n=3$  biologically independent samples, each containing 16 imaged fields for each of DNAJB14-FL and DNAJB14-short neuronal cultures (containing 741 and 883, 659 and 689, 1131 and 1208 neurons for DNAJB14-FL and -short respectively). Mean fraction of aggregate-containing cells was very low for both types (0-2.96%) and no consistent difference was observed between DNAJB14-FL and DNAJB14-short cultures ( $p=5e-4$ , 0.15 0.12 for the three experiments respectively, using t-test, two-sided, non-adjusted). NS-Non significant. Source data are provided as a Source Data file. (d) Fluorescence confocal microscopy images of live neurons infected with FUS-WT-YFP and DNAJB14-FL or DNAJB14-short viruses. Shown are maximum projection images. Shown are representative fields from  $n=3$  biologically independent experiments. (e) Fluorescence confocal microscopy images of live neurons infected with FUS-R521H-YFP and DNAJB14-FL or DNAJB14-short viruses, additional fields, as in Fig. 7c, maximum projection images. (f) Image analysis of thousands of live neurons using confocal microscopy images in FUS-R521H-YFP expressing neurons, co-expressing either DNAJB14-FL or DNAJB14-short. Cells were infected with both FUS-R521H-YFP and DNAJB14-FL or DNAJB14-short containing viruses at day 5 of culture, and imaged six days later. Data are presented as mean values  $\pm$  SEM of  $n=3$  biologically independent experiments, containing 12, 24 and 37 imaged fields for each of DNAJB14-FL and DNAJB14-short neuronal cultures (with 884 and 1081, 1339 and 1069, 2281 and 2231 neurons for DNAJB14-FL and -short respectively). Mean fraction of aggregate-containing cells was consistently and significantly lower in all replicates for the DNAJB14-FL infected neurons ( $p=7.9e-7$ , 0.023 and  $5.7e-3$  for the three experiments respectively, calculated using t-test, two-sided, non-adjusted). Source data are provided as a Source Data file.



|               | Aggregation Modulation score,<br>Log2(AGG+ chaprone/AGG+ control) |               |
|---------------|-------------------------------------------------------------------|---------------|
|               | HTT-134Q-GFP                                                      | FUS-R521H-YFP |
| DNAJC5        | -0.113307                                                         | -3.729123     |
| DNAJB12-FL    | 0.1968                                                            | -2.364345     |
| DNAJC5B       | -0.052375                                                         | -1.496803     |
| DNAJB14       | 0.35167                                                           | -0.820585     |
| BAG3          | 0.40197                                                           | -0.589478     |
| HSF1          | -0.094859                                                         | -0.529681     |
| DNAJC30       | -0.106081                                                         | -0.446112     |
| HSPA1A        | 0.036035                                                          | -0.275731     |
| DNAJC18       | 0.291406                                                          | -0.274582     |
| DNAJB3        | -0.001949                                                         | -0.227938     |
| DNAJB12-short | -0.1721                                                           | -0.216087     |
| DNAJC25       | 0.194227                                                          | -0.198707     |
| BAG4          | 0.090443                                                          | -0.173658     |
| DNAJC7        | 0.134615                                                          | -0.164522     |
| DNAJC8        | 0.180654                                                          | -0.15035      |
| DNAJC11       | 0.11339                                                           | -0.130547     |
| STUB1         | -0.050036                                                         | -0.120089     |
| DNAJB6-FL     | 0.093471                                                          | -0.10904      |
| BAG6          | 0.291876                                                          | -0.097508     |
| DNAJB11       | -0.070419                                                         | -0.09708      |
| DNAJB1        | 0.002933                                                          | -0.089131     |
| DNAJA4        | -0.023463                                                         | -0.086803     |
| HSPA4L        | 0.39252                                                           | -0.075485     |
| NACA2         | 0.022559                                                          | -0.072791     |
| HSPB7         | -0.184632                                                         | -0.070836     |
| HSP90B1       | 0.2014                                                            | -0.064825     |
| DNAJC4        | 0.184967                                                          | -0.048632     |
| NACA          | 0.10543                                                           | -0.02292      |
| HSPA2         | 0.072448                                                          | -0.020248     |

|              |           |           |
|--------------|-----------|-----------|
| BAG1         | 0.11289   | -0.011521 |
| HSPBP1       | 0.274247  | 0.003268  |
| HSPB2        | -0.041814 | 0.004548  |
| BAG2         | 0.203127  | 0.010261  |
| BTF3         | 0.027953  | 0.010796  |
| DNAJA1       | 0.306336  | 0.022616  |
| BAG5         | 0.331059  | 0.025385  |
| HSPA9        | 0.560907  | 0.032971  |
| DNAJB6-short | -0.359926 | 0.037348  |
| DNAJC27      | 0.125898  | 0.040014  |
| HSPA6        | 0.252707  | 0.047343  |
| DNAJC12      | 0.043845  | 0.051139  |
| DNAJC24      | 0.06382   | 0.05479   |
| DNAJC10      | 0.208447  | 0.061539  |
| DNAJC15      | 0.071714  | 0.063922  |
| DNAJA2       | -0.006321 | 0.073894  |
| HIP1         | 0.303613  | 0.075073  |
| DNAJC1       | 0.033051  | 0.075224  |
| DNAJA3       | -0.050989 | 0.084366  |
| DNAJC22      | 0.252113  | 0.095148  |
| DNAJC16      | 0.145377  | 0.098937  |
| DNAJC17      | 0.21594   | 0.101648  |
| DNAJC19      | 0.1494    | 0.110745  |
| DNAJC6       | 0.190963  | 0.113984  |
| HSPA4        | 0.251961  | 0.116909  |
| DNAJB2b      | 0.312427  | 0.137794  |
| DNAJB4       | 0.047865  | 0.138461  |
| DNAJC3       | 0.203423  | 0.140922  |
| DNAJC28      | 0.175631  | 0.143392  |
| DNAJB9       | 0.035527  | 0.143933  |
| DNAJB8       | -1.00032  | 0.15541   |
| HSP90AB1     | 0.293016  | 0.169219  |

|          |           |          |
|----------|-----------|----------|
| HSPH1    | 0.206341  | 0.178009 |
| DNAJC14  | 0.17258   | 0.195298 |
| HSPA14   | 0.26328   | 0.209752 |
| HSP90AA1 | 0.18037   | 0.26606  |
| DNAJB5   | -0.002481 | 0.306305 |

### Supplementary Table 1

Aggregation modulation score for 66 chaperones that participated in the aggregation modulation screens, with respect to HTT-134Q or FUS-R521H-YFP.

|                  | Primers used in this study                                           | Primer type |
|------------------|----------------------------------------------------------------------|-------------|
| B14_Sh_F         | GGGGACAAGTTTGTACAAAAAAGCAGGCTTC<br>ATGGAGGGGAACAGGGATG               | cloning     |
| B14_Sh_R         | GGGGACCACTTTGTACAAGAAAGCTGGGT<br>CCTGAGAACTCCATCTACTTGGTCTT          | cloning     |
| B14_duf_F        | GGGGACAAGTTTGTACAAAAAAGCAGGCTTCATGGAGGGGAACAGGG                      | cloning     |
| B14_duf_R        | GGGGACCACTTTGTACAAGAAAGCTGGGT<br>GACCATCAACTGGCTTAAT                 | cloning     |
| B14_HPDMut_t408a | atggttttgtctggtgaaactcaaagcaagctttctataagc                           | mutagenesis |
|                  | gcttatagaaagcttgcttgaagttcaaccagacaaaaacat                           | mutagenesis |
| B14_HPDMut_t408g | atggttttgtctggctgaaactcaaagcaagctttctataagc                          | mutagenesis |
|                  | gcttatagaaagcttgcttgaagttcagccagacaaaaacat                           | mutagenesis |
| B14- Δshort F    | GGGGACAAGTTTGTACAAAAAAGCAGGCTTC<br>ATGATAAACAAATGTAAAAATTACTATGAAGTA | cloning     |
| B14-Δshort R     | GGGGACCACTTTGTACAAGAAAGCTGGGT<br>TCCTCCTTTATAAAGACTGGTAAG            | cloning     |
| HSPA7 F          | atacgcgttgGGATCCGACCTCCCACAGCCCCGG                                   | cloning     |
| HSPA7 R          | atttcgataaCTTGTCGGATGCTGGAGGCCACGGA                                  | cloning     |
| HSPA1A F         | ccccaccattgaggaggt                                                   | qPCR        |
| HSPA1A R         | tcaacattgcaaacacaggaa                                                | qPCR        |
| HPRT F           | TGACACTGGCAAAACAATGCA                                                | qPCR        |
| HPRT R           | GGTCCTTTTCACCAGCAAGCT                                                | qPCR        |
| HSPA5 F RAT      | TGCAGCAGGACATCAAGTTC                                                 | qPCR        |
| HSPA5 R RAT      | TTTCTTCTGGGGCAAATGTC                                                 | qPCR        |
| PSMD 12 F RAT    | GAAAGTGACAAGTGGCAGCA                                                 | qPCR        |
| PSMD 12 R RAT    | CCGGTGAACCAAATCTGACT                                                 | qPCR        |

|                                      |                                 |             |
|--------------------------------------|---------------------------------|-------------|
| BAG4 F RAT                           | GGCACTTACTCCACGGACAT            | qPCR        |
| BAG4 R RAT                           | CAGTCCTGCTGGGGATACAT            | qPCR        |
| DNAJB11 F RAT                        | TACCTCTCCCTCTGGGGATT            | qPCR        |
| DNAJB11 R RAT                        | TGACCCTCATCTGTGCTCTG            | qPCR        |
| DNAJC2 F RAT                         | AGGAAGAAGGAAAGGCCAAG            | qPCR        |
| DNAJC2 R RAT                         | AGCCAACCGAACAGCTTCTA            | qPCR        |
| DNAJC3 F RAT                         | GATTGGGTCAGCTGAAGAGC            | qPCR        |
| DNAJC3 R RAT                         | GCGGACTGTGTACTCAGCAA            | qPCR        |
| HSP90AB1 F RAT                       | ACCCATTGTGGAGACTCTG             | qPCR        |
| HSP90AB1 R RAT                       | AGCAGTCTCAAACAGCAGCA            | qPCR        |
| HSPA9 F RAT                          | GACAGGACGTGAGCAACAGA            | qPCR        |
| HSPA9 R RAT                          | TCTTCCTCCGGTCTTCTTCA            | qPCR        |
| HPRT F RAT                           | TCCAACACTTCGAGAGGTCCTTTTCAC     | qPCR        |
| HPRT R RAT                           | GGGGGCTATAAGTTCTTTGCTGACC       | qPCR        |
| FUS p.R521C                          | gcctctccctgcaatcctgtctgtgctca   | mutagenesis |
|                                      | tgagcacagacaggattgcaggagagggc   | mutagenesis |
| FUSp.R495X                           | gaaagctgggtccaagaagcctccacggtc  | mutagenesis |
|                                      | gaccgtggaggcttcttggaaccagctttc  | mutagenesis |
| FUS p.R495EfsX527                    | cccggccccctcgaagcctccacg        | mutagenesis |
|                                      | cgtaggaggttcgagggggccggg        | mutagenesis |
| FUS isoforms stage2<br>- Frame shift | caggagagggccgtattttggaaccagcttt | mutagenesis |
|                                      | aaagctgggtccaaatacggcctctccctg  | mutagenesis |

## Supplementary Table 2

Primers used in this study.

### **Supplementary References:**

1. Ramdzan YM, *et al.* Tracking protein aggregation and mislocalization in cells with flow cytometry. *Nat Methods* **9**, 467-470 (2012).
2. Sabath N, *et al.* Cellular proteostasis decline in human senescence. *Proc Natl Acad Sci U S A* **117**, 31902-31913 (2020).
3. Brehme M, *et al.* A chaperome subnetwork safeguards proteostasis in aging and neurodegenerative disease. *Cell Rep* **9**, 1135-1150 (2014).
